# Supplementary material for: Development of Analytical Strategies for the Determination of Olive Fruit Bioactive Compounds Using UPLC-HRMS and HPLC-DAD. Chemical Characterization of Kolovi Lesvos Variety as a Case Study
Source: MDPI journal article supplement (doi:10.3390/molecules26237182), 2021-11-26
Supplement: s1 [file s1]

# **Development of analytical strategies for the determination of olive fruit bioactive compounds using UPLC-HRMS and HPLC-DAD. Chemical characterization of Kolovi Lesvos variety as a case study.**

**Ioannis C. Martakos<sup>†</sup>, Panagiota Katsianou<sup>†</sup>, Georgios Koulis, Elvira Efstratiou, Eleni Nastou, Stylianos Nikas, Marilena Dasenaki, Michalis Pentogennis and Nikolaos Thomaidis**

<sup>†</sup> These authors contributed equally to this work.



# Electronic Supplementary Material

## Table of contents

|                                                                                                                                                                                                                                                                                                                                                                                        |    |
|----------------------------------------------------------------------------------------------------------------------------------------------------------------------------------------------------------------------------------------------------------------------------------------------------------------------------------------------------------------------------------------|----|
| <b>Table S1.</b> Recovery rate % and SD for each spiked compound in 2 different experiments.....                                                                                                                                                                                                                                                                                       | 4  |
| <b>Table S2.</b> Recovery rate % and SD for each spiked compound.....                                                                                                                                                                                                                                                                                                                  | 5  |
| <b>Table S3.</b> %Recovery rate (%R) and SD for each spiked compound.....                                                                                                                                                                                                                                                                                                              | 6  |
| <b>Table S4.</b> Evaluation of linearity, repeatability, intermediate precision, trueness and selectivity for the determination of phenolic compounds in olive fruits.....                                                                                                                                                                                                             | 7  |
| <b>Table S5.</b> Target list of phenolic compounds.....                                                                                                                                                                                                                                                                                                                                | 8  |
| <b>Table S6.</b> Suspect list of bioactive compounds encountered in olive samples.....                                                                                                                                                                                                                                                                                                 | 9  |
| <b>Figure S1.</b> Identification data for the mass feature m/z 577.1602_5.7 min (Isorhoifolin).....                                                                                                                                                                                                                                                                                    | 13 |
| <b>Figure S2.</b> Identification data for the mass feature m/z 431.0984_5.9 min (apigenin-7 glucoside).....                                                                                                                                                                                                                                                                            | 15 |
| <b>Figure S3.</b> Identification data for the mass feature m/z 389.1089_1.8 min (oleoside).....                                                                                                                                                                                                                                                                                        | 16 |
| <b>Figure S4.</b> Identification data for the mass feature m/z 551.1406_4.2 min (caffeoyl 6-secologanoside).....                                                                                                                                                                                                                                                                       | 18 |
| <b>Figure S5.</b> Identification data for the mass feature m/z 535.1455_4.6 min (Comselogoside).....                                                                                                                                                                                                                                                                                   | 19 |
| <b>Figure S6.</b> Identification data for the mass feature m/z 543.2083_5.4 min (dihydrooleuropein).....                                                                                                                                                                                                                                                                               | 20 |
| <b>Figure S7.</b> Identification data for the mass feature m/z 623.1981_5.3 min (Isoverbascoside).....                                                                                                                                                                                                                                                                                 | 21 |
| <b>Figure S8.</b> Identification data for the mass feature m/z 639.1929_4.3 min (beta-hydroxyacteoside).....                                                                                                                                                                                                                                                                           | 23 |
| <b>Figure S9.</b> Identification data for the mass feature m/z 167.0350_3.1 min (3,4 dihydroxyphenylacetic acid).....                                                                                                                                                                                                                                                                  | 25 |
| <b>Table S7.</b> Maturation stage of Kolovi samples.....                                                                                                                                                                                                                                                                                                                               | 26 |
| <b>Table S8.</b> LC gradient elution and flow rate program (UPLC-QTOF-MS).....                                                                                                                                                                                                                                                                                                         | 26 |
| <b>Figure S10.</b> Chromatograms from the analysis of olive drupes. spiked with known amount of the analytes of interest. A: 410 nm (spiked with 25 mg/kg chlorophyll a). B: 450 nm (spiked with 3 mg/kg lutein and 2.95 mg/kg $\beta$ -carotene). C: 295 nm (spiked with 50 mg/kg $\alpha$ -, $\gamma$ -, and $\delta$ -tocopherols). D: 210 nm (spiked with 500 mg/kg squalene)..... | 27 |

**Table S1.** Recovery rate % and SD for each spiked compound in 2 different experiments

|                  | Raw olive fruit   | Freeze-dried olive fruit |
|------------------|-------------------|--------------------------|
| Compound         | R% $\pm$ SD (n=3) | R% $\pm$ SD (n=3)        |
| Apigenin         | 64 $\pm$ 12       | 71 $\pm$ 9.3             |
| Caffeic acid     | 72 $\pm$ 10       | 92 $\pm$ 5.3             |
| Chlorogenic acid | 114 $\pm$ 17      | 81 $\pm$ 17              |
| Cinnamic acid    | 114 $\pm$ 14      | 94 $\pm$ 13              |
| Eriodictyol      | 57 $\pm$ 9.5      | 81 $\pm$ 6.6             |
| Ferulic acid     | 106 $\pm$ 8.2     | 85 $\pm$ 8.9             |
| Hydroxytyrosol   | 93 $\pm$ 14       | 102 $\pm$ 15             |
| Kaempferol       | 75 $\pm$ 16       | 54 $\pm$ 14              |
| Luteolin         | 77 $\pm$ 19       | 96 $\pm$ 17              |
| Naringenin       | 89 $\pm$ 14       | 60 $\pm$ 10              |
| Oleuropein       | 86 $\pm$ 12       | 101 $\pm$ 8.8            |
| P-coumaric acid  | 64 $\pm$ 11       | 96 $\pm$ 6.4             |
| Pinoresinol      | 114 $\pm$ 20      | 94 $\pm$ 19              |
| Quercetin        | 54 $\pm$ 11       | 63 $\pm$ 6.9             |
| Rutin            | 72 $\pm$ 20       | 98 $\pm$ 19              |
| Salicylic acid   | 120 $\pm$ 8.3     | 92 $\pm$ 7.1             |
| Syringic acid    | 78 $\pm$ 9.3      | 86 $\pm$ 8.8             |
| Taxifolin        | 80 $\pm$ 11       | 59 $\pm$ 11              |
| Tyrosol          | 117 $\pm$ 12      | 113 $\pm$ 9.6            |
| Vanillic acid    | 101 $\pm$ 8.7     | 105 $\pm$ 8.2            |
| Vanillin         | 101 $\pm$ 13      | 72 $\pm$ 12              |

**Table S2.** Recovery rate % and SD for each spiked compound

|                  | MeOH: H <sub>2</sub> O (80:20) | 100% MeOH     |
|------------------|--------------------------------|---------------|
| Analyte          | R% ± SD (n=3)                  | R% ± SD (n=3) |
| Apigenin         | 71 ± 9.3                       | 62 ± 9.9      |
| Caffeic acid     | 92 ± 5.6                       | 98 ± 3.9      |
| Chlorogenic acid | 81 ± 17                        | 83 ± 16       |
| Cinnamic acid    | 94 ± 13                        | 91 ± 11       |
| Eriodictyol      | 81 ± 6.6                       | 70 ± 6.9      |
| Ferulic acid     | 85 ± 8.0                       | 88 ± 8.2      |
| Hydroxytyrosol   | 102 ± 12                       | 102 ± 11      |
| Kaempferol       | 44 ± 15                        | 45 ± 16       |
| Luteolin         | 96 ± 17                        | 94 ± 17       |
| Narinegin        | 40 ± 10                        | 46 ± 9.4      |
| Oleuropein       | 101 ± 8.8                      | 111 ± 5.8     |
| P-coumaric acid  | 96 ± 6.4                       | 101 ± 3.1     |
| Pinoresinol      | 94 ± 19                        | 117 ± 13      |
| Quercetin        | 53 ± 6.9                       | 44 ± 8.6      |
| Rutin            | 98 ± 19                        | 101 ± 12      |
| Salicylic acid   | 92 ± 7.5                       | 94 ± 4.9      |
| Syringic acid    | 86 ± 8.8                       | 88 ± 7.3      |
| Taxifolin        | 39 ± 11                        | 39 ± 5.7      |
| Tyrosol          | 113 ± 9.6                      | 116 ± 5.9     |
| Vanillic acid    | 105 ± 8.2                      | 125 ± 8.8     |
| Vanillin         | 72 ± 12                        | 94 ± 13       |

**Table S3.** %Recovery rate (%R) and SD for each spiked compound

|                  | Without SPE       | SPE (HLB)         | SPE (C18)         | SPE (ISOLUTE)     |
|------------------|-------------------|-------------------|-------------------|-------------------|
| Analyte          | R% $\pm$ SD (n=3) |
| Apigenin         | 42 $\pm$ 9.9      | 60 $\pm$ 11       | 65 $\pm$ 8.6      | 75 $\pm$ 8.9      |
| Caffeic acid     | 102 $\pm$ 3.9     | 96 $\pm$ 4.0      | 43 $\pm$ 5.4      | 78 $\pm$ 3.8      |
| Chlorogenic acid | 59 $\pm$ 16       | 58 $\pm$ 14       | 13 $\pm$ 10       | 61 $\pm$ 13       |
| Cinnamic acid    | 24 $\pm$ 1.1      | 20 $\pm$ 7.3      | 18 $\pm$ 7.5      | 19 $\pm$ 9.8      |
| Eriodictyol      | 37 $\pm$ 6.9      | 55 $\pm$ 4.3      | 68 $\pm$ 10       | 86 $\pm$ 8.0      |
| Ferulic acid     | 58 $\pm$ 8.2      | 61 $\pm$ 5.8      | 54 $\pm$ 12       | 70 $\pm$ 8.9      |
| Gallic acid      | 54 $\pm$ 11       | 77 $\pm$ 15       | 18 $\pm$ 13       | 1 $\pm$ 9.8       |
| Hydroxytyrosol   | 107 $\pm$ 11      | 95 $\pm$ 14       | 123 $\pm$ 10      | 41 $\pm$ 18       |
| Luteolin         | 67 $\pm$ 17       | 94 $\pm$ 22       | 110 $\pm$ 15      | 92 $\pm$ 11       |
| Oleuropein       | 61 $\pm$ 5.1      | 100 $\pm$ 1.5     | 155 $\pm$ 3.2     | 98 $\pm$ 2.1      |
| Pinoresinol      | 102 $\pm$ 13      | 67 $\pm$ 8.9      | 82 $\pm$ 5.4      | 74 $\pm$ 13       |
| Quercetin        | 26 $\pm$ 8.6      | 53 $\pm$ 10       | 33 $\pm$ 5.5      | 68 $\pm$ 3.8      |
| Syringic acid    | 61 $\pm$ 7.3      | 67 $\pm$ 15       | 40 $\pm$ 8.5      | 56 $\pm$ 6.9      |
| Tyrosol          | 89 $\pm$ 5.9      | 88 $\pm$ 8.5      | 67 $\pm$ 6.8      | 55 $\pm$ 7.3      |
| Vanillic acid    | 60 $\pm$ 8.8      | 102 $\pm$ 9.5     | 53 $\pm$ 4.5      | 80 $\pm$ 5.4      |
| Vanillin         | 22 $\pm$ 14       | 11 $\pm$ 18       | 18 $\pm$ 20       | 18 $\pm$ 15       |
| Kaempferol       | 39 $\pm$ 16       | 47 $\pm$ 10       | 49 $\pm$ 18       | 66 $\pm$ 11       |
| Naringenin       | 40 $\pm$ 9.4      | 37 $\pm$ 10       | 24 $\pm$ 13       | 79 $\pm$ 7.8      |
| p-coumaric acid  | 81 $\pm$ 3.1      | 84 $\pm$ 5.6      | 78 $\pm$ 2.8      | 61 $\pm$ 1.6      |
| Rutin            | -                 | 88 $\pm$ 19       | 145 $\pm$ 22      | 99 $\pm$ 16       |
| Salicylic acid   | 77 $\pm$ 4.9      | 79 $\pm$ 8.8      | 62 $\pm$ 7.9      | 74 $\pm$ 10       |
| Taxifolin        | 49 $\pm$ 5.7      | 55 $\pm$ 7.8      | 43 $\pm$ 3.5      | 61 $\pm$ 10       |

**Table S4.** Evaluation of linearity, repeatability, intermediate precision, trueness and selectivity for the determination of phenolic compounds in olive fruits

| compound                    | Linearity<br>R <sup>2</sup> % | LOD<br>(mg/kg) | LOQ<br>(mg/kg) | Repeatability<br>RSD <sub>r</sub> % |         |         | Intermediate precision<br>RSD <sub>R</sub> % |         |         | Trueness (Accuracy)<br>R% |         |         | ME%     |         |         |
|-----------------------------|-------------------------------|----------------|----------------|-------------------------------------|---------|---------|----------------------------------------------|---------|---------|---------------------------|---------|---------|---------|---------|---------|
|                             |                               |                |                | Level A                             | Level B | Level C | Level A                                      | Level B | Level C | Level A                   | Level B | Level C | Level A | Level B | Level C |
| 2 cis-4 trans abscicic acid | 0.997                         | 0.52           | 1.5            | 7.9                                 | 17      | 9.0     | 9.9                                          | 21      | 8.6     | 70                        | 102     | 102     | -41     | -83     | 0       |
| 2.5 ihydroxybenzoic acid    | 0.999                         | 0.30           | 0.91           | 7.5                                 | 7.0     | 7.0     | 11                                           | 18      | 8.7     | 62                        | 87      | 99      | 48      | 49      | 36      |
| 4 hydroxybenzoic acid       | 1.000                         | 0.15           | 0.45           | 13                                  | 3.7     | 3.1     | 21                                           | 8.3     | 3.8     | 79                        | 96      | 93      | 74      | 77      | 76      |
| apigenin                    | 0.983                         | 1.7            | 5.2            | 2.7                                 | 10      | 5.3     | 5.3                                          | 15      | 4.1     | 78                        | 81      | 88      | 0,6     | -1,2    | -8,2    |
| caffeic acid                | 0.997                         | 0.55           | 1.6            | 11                                  | 4.2     | 7       | 21                                           | 12      | 6.5     | 71                        | 86      | 92      |         |         | 20      |
| chlorogenic acid            | 0.996                         | 1.4            | 4.1            |                                     | 17      | 2.1     |                                              | 33      | 11      |                           |         |         |         |         | 20      |
| cinnamic acid               | 0.998                         | 0.42           | 1.3            | 9.5                                 | 14      | 8.9     | 8.8                                          | 19      | 8.6     | 61                        | 85      | 90      | -58     | -28     | -0,5    |
| citric acid                 | 0.995                         | 0.68           | 2.0            | 8,5                                 | 11      | 7,7     | 13                                           | 27      | 13      |                           |         |         |         | 42      | 73      |
| diosmetin                   | 0.948                         | 0.46           | 1.4            | 15                                  | 14      | 1.6     | 15                                           | 20      | 5.3     | 70                        | 83      | 97      | -23     | -18     | -9,4    |
| eriodictyol                 | 0.980                         | 1.9            | 5.7            |                                     | 19      | 9.4     |                                              | 25      | 13      |                           | 136     | 76      |         |         | -512    |
| eudesmic acid               | 0.997                         | 0.50           | 1.5            | 8                                   | 14      | 6.9     | 8.4                                          | 17      | 7.2     | 75                        | 97      | 98      | 79      | 28      | 15      |
| ferulic acid                | 0.997                         | 0.52           | 1.6            | 9.2                                 | 14      | 6.4     | 9.0                                          | 18      | 6.1     | 68                        | 97      | 97      | -35     | 8,4     | 10      |
| homovanillic acid           | 0.980                         | 3.1            | 9.2            |                                     |         | 10      |                                              |         | 10      |                           |         | 98      |         | -11     | 7,5     |
| hydroxytyrosol              | 0.985                         | 1.6            | 4.9            | 3.4                                 | 13      | 11      | 6.0                                          | 12      | 8.3     | 98                        | 100     | 95      |         | -285    | -2,7    |
| naringenin                  | 0.978                         | 1.4            | 4.3            | 14                                  | 11      | 7.0     | 11                                           | 14      | 5.9     | 67                        | 93      | 98      | 0,86    | 66      | 7,4     |
| oleuropein                  | 0.997                         | 0.57           | 1.7            | 7.4                                 | 15      | 8.9     | 7.0                                          | 19      | 7.8     | 82                        | 111     | 98      | -327    | -348    | -73     |
| p coumaric acid             | 0.985                         | 1.2            | 3.6            | 8.9                                 | 4.1     | 7.2     | 10                                           | 12      | 7.2     | 75                        | 93      | 105     | 6,7     | 7,7     | 6,4     |
| pinoresinol                 | 0.998                         | 0.47           | 1.4            | 8.5                                 | 16      | 6.8     | 9.8                                          | 21      | 7.5     | 76                        | 109     | 100     | -79     | -44     | -13     |
| quercetin                   | 0.983                         | 1.3            | 3.9            | 23                                  | 5.0     | 20      | 20                                           | 22      | 15      | 59                        | 60      | 66      |         |         |         |
| quinic acid                 | 0.994                         | 1.7            | 5.1            |                                     |         | 14      |                                              |         | 11      |                           |         | 77      |         |         | 97      |
| rutin                       | 0.989                         | 2.3            | 6.9            |                                     | 22      | 19      |                                              | 32      | 17      |                           | 140     | 93      |         |         | -243    |
| salicylic acid              | 0.985                         | 1.2            | 3.6            | 7.7                                 | 9.8     | 6.5     | 8.5                                          | 14      | 7       | 72                        | 89      | 90      | 7,1     | -25     | 6,4     |
| sinapic acid                | 0.995                         | 0.66           | 2.0            | 10                                  | 10      | 7.6     | 9.1                                          | 18      | 9.6     | 62                        | 96      | 96      |         | -1,6    | 1,8     |
| syringic acid               | 0.997                         | 1.2            | 3.7            |                                     | 7.1     | 3.4     |                                              | 10      | 6.7     |                           | 107     | 90      |         | 16      | 43      |
| tyrosol                     | 0.952                         | 3.6            | 11             | 2.5                                 | 15      | 11      | 5.0                                          | 12      | 8.6     | 95                        | 100     | 94      | 155     | -189    | -29     |
| vanillic acid               | 0.999                         | 0.39           | 1.2            | 11                                  | 8.2     | 2.8     | 11                                           | 10      | 4.2     | 106                       | 98      | 98      |         | 51      | 66      |
| vanillin                    | 0.997                         | 0.55           | 1.7            | 28                                  | 11      | 25      | 21                                           | 13      | 20      | 25                        | 47      | 61      | -248    | -83     | -8,7    |

Table S5. Target list of phenolic compounds

| Compound                     | Molecular formula | [M-H] <sup>-</sup> m/z | tR (min) | q1 m/z   | q1 formula | q2 m/z   | q2 formula | q3 m/z   | q3 formula | q4 m/z              | q4 formula            |
|------------------------------|-------------------|------------------------|----------|----------|------------|----------|------------|----------|------------|---------------------|-----------------------|
| Ferulic acid                 | C10H10O4          | 193.050632             | 3        | 134.037  | C8H6O2     | 178.0271 | C9H6O4     |          |            |                     |                       |
| Apigenin                     | C15H10O5          | 269.045547             | 8.24     | 269.0455 | C15H9O5    | 117.0346 | C8H5O      | 151.0037 | C7H3O4     | 65.0033             | C4HO                  |
| Luteolin                     | C15H10O6          | 285.040462             | 7.55     | 285.0405 | C15H9O6    | 133.0295 | C8H5O2     |          |            |                     |                       |
| kaempferol                   | C15H10O6          | 285.040462             | 8        | 229.0502 | C13H9O4    | 185.061  | C12H9O2    | 133.0297 | C8H5O2     |                     |                       |
| Quercetin                    | C15H10O7          | 301.035376             | 7.2      | 151.0025 | C7H3O4     | 178.9975 | C8H3O5     | 121.0284 | C7H5O2     |                     |                       |
| naringenin                   | C15H12O5          | 271.061197             | 7.2      | 119.0491 | C8H7O      | 151.0025 | C7H3O4     | 177.0182 | C9H5O4     |                     |                       |
| Eriodictyol                  | C15H12O6          | 287.056112             | 6.4      | 151.0025 | C7H3O4     | 135.044  | C8H7O2     |          |            |                     |                       |
| Catechin                     | C15H14O6          | 289.071762             | 3.87     | 203.0705 | C12H11O3   | 123.0458 | C7H7O2     |          |            |                     |                       |
| Chlorogenic acid             | C16H18O9          | 353.087806             | 2.7      | 191.0566 | C7H11O6    |          |            |          |            |                     |                       |
| oleocanthal                  | C17H20O5          | 303.123797             | 6.6      | 137.0611 | C8H9O2     | 165.0552 | C9H9O3     | 183.0666 | C9H11O4    | 95.0492             | C6H7O                 |
| oleacin                      | C17H20O6          | 319.118712             | 5.8      | 69.0346  | C4H5O      | 95.0502  | C6H7O      | 70.0424  | C4H6O      | 139.0765            | C8H11O2               |
| oleocanthalic acid           | C17H20O6          | 319.118712             | 5.2      | 199.0615 | C9H11O5    | 111.0085 | C5H3O3     |          |            |                     |                       |
| Lingstroside aglycone        | C19H22O7          | 361.129277             | 8.3      | 259.0975 | C15H15O4   | 291.0875 | C15H15O6   | 127.0396 | C6H7O3     |                     |                       |
| Oleokoronal                  | C19H22O7          | 361.129277             | 6.8      | 259.0975 | C15H15O4   | 291.0875 | C15H15O6   | 171.0279 | C7H7O5     |                     |                       |
| oleomissional                | C19H22O8          | 377.124191             | 6        | 275.0555 | C15H15O5   | 307.0823 | C15H15O7   | 139.0398 | C7H7O3     | 149.0242            | C8H5O3                |
| Oleuropein aglycone          | C19H22O8          | 377.124191             | 7.29     | 111.0088 | C5H3O3     | 149.0244 | C8H5O3     | 195.0644 | C10H11O4   | 275.0919            | C15H15O5              |
| Pinoresinol                  | C20H22O6          | 357.134362             | 6.49     | 151.0399 | C8H7O3     | 136.0163 |            |          |            |                     |                       |
| Oleuropein                   | C25H32O13         | 539.177015             | 5.96     | 121.0295 | C7H5O2     | 307.0823 | C15H15O7   | 377.1242 | C19H21O8   | 275.0924            | C15H15O5              |
| salycilic acid               | C7H6O3            | 137.024418             | 3.7      | 93.0346  | C6H5O      | 65.0397  | C5H5       |          |            |                     |                       |
| Gallic acid                  | C7H6O5            | 169.014247             | 1.25     | 125.0244 | C6H5O3     | 69.0346  | C4H5O      |          |            |                     |                       |
| Tyrosol                      | C8H10O2           | 137.060803             | 4.07     | 93.0345  | C6H5O      | 119.0506 | C8H7O      |          |            |                     |                       |
| Hydroxytyrosol               | C8H10O3           | 153.055718             | 3.53     | 123.0446 | C7H7O2     |          |            |          |            |                     |                       |
| Vanillin                     | C8H8O3            | 151.040068             | 4.73     | 71.014   | C3H3O2     | 95.014   | C5H3O2     | 108.0217 | C6H4O2     | 136.0162            | C7H4O3                |
| Vanillic acid                | C8H8O4            | 167.034982             | 1.6      | 152.0109 | C5H2N3O3   | 125.0233 | C6H5O3     | 91.0177  | C6H3O      | 108.0212            |                       |
| Homovanillic acid            | C9H10O4           | 181.050632             | 2.4      | 69.0352  | C4H5O      | 122.0369 | C7H6O2     | 134.0361 |            | C8H7O2 <sup>1</sup> | 135.0445              |
|                              |                   |                        |          |          |            |          |            |          |            | -                   |                       |
| Syringic acid                | C9H10O5           | C9H10O5                | 2        | 123.0076 | C6H3O3     | 166.9975 | C7H3O5     |          |            |                     |                       |
| Cinnamic acid                | C9H8O2            | 147.045153             | 4.5      | 147.044  | C9H7O2     |          |            |          |            |                     |                       |
| p-coumaric acid              | C9H8O3            | 163.040068             | 2.6      | 119.0506 | C8H7O      | 93.0349  | C6H5O      |          |            |                     |                       |
| Caffeic acid                 | C9H8O4            | 179.034982             | 1.9      | 135.044  | C8H7O2     | 134.0348 | C6H4N3O    |          |            |                     |                       |
| taxifolin                    | C15H12O7          | 303.051026             | 4.9      | 285.0393 | C15H9O6    | 125.0233 | C6H5O3     | 153.0182 | C7H5O4     |                     |                       |
| rutin                        | C27H30O16         | 609.146108             | 5.5      | 301.0335 | C15H9O7    | 146.963  |            |          |            |                     |                       |
| verbascoside                 | C29H36O15         | 623.198144             | 4.9      | 161.0242 | C9H5O3     | 303.554  | C8H15O12   | 461.1652 | C20H29O12  |                     |                       |
| 2,5-dihydroxybenzoic acid    | C7H6O4            | 153.019332             | 2.41     | 108.0217 | C6H4O2     | 109.0295 | C6H5O2     | 81.0346  | C5H5O      |                     |                       |
| 2-cis,4-trans-Absciscic acid | C15H20O4          | 263.128883             | 5.02     | 204.1156 | C13H16O2   | 219.1391 | C14H19O2   | 151.0765 | C9H11O2    |                     |                       |
| 3,4-Dihydroxybenzoic acid    | C7H6O4            | 153.019332             | 1.35     | 109.0295 | C6H5O2     | 108.0217 | C6H4O2     | 81.0346  | C5H5O      |                     |                       |
| 4-hydroxybenzoic acid        | C7H6O3            | 137.024418             | 1.45     | 93.0346  | C6H5O      | 65.0397  | C5H5       |          |            |                     |                       |
| diosmetin                    | C16H12O6          | 299.056112             | 8.2      | 284.0332 | C13H6N3O5  | 151.0025 | C7H3O4     |          |            |                     |                       |
| sinapic acid                 | C11H12O5          | 223.061197             | 3.1      | 193.0145 | C9H5O5     | 149.0244 | C8H5O3     | 121.0307 | C7H5O2     | 135.0445            | C8H7O2 <sup>1</sup> - |
| quinic acid                  | C7H12O6           | 191.056112             | 1.2      | 127.0398 | C7H7O3     | 171.0299 | C7H7O5     | 111.012  | C5H3O3     |                     |                       |
| eudesmic acid                | C10H12O5          | 211.061197             | 3.4      | 137.0244 | C7H5O3     | 167.0699 | C9H11O3    | 152.0471 | C11H6N     |                     |                       |
| citric acid                  | C6H8O7            | 191.019726             | 1.1      | 111.0062 | C5H3O3     | 129.0205 | C6HN4      |          |            |                     |                       |
| neochlorogenic acid          | C16H18O9          | 353.087806             | 2.8      | 191.0555 | C7H11O6    | 179.0347 | C9H7O4     |          |            |                     |                       |



**Table S6.** Suspect list of bioactive compounds encountered in olive samples

| ID | Compound name                         | Molecular formula                                | monoisotopic mass | [M-H] <sup>-</sup> | Rt predicted | Qual.1   | Qual.2   | Qual.3   | Qual.4   | Reference |
|----|---------------------------------------|--------------------------------------------------|-------------------|--------------------|--------------|----------|----------|----------|----------|-----------|
| 1  | 3,4-Dihydroxyphenylglycol             | C <sub>8</sub> H <sub>10</sub> O <sub>4</sub>    | 170.0579          | 169.0506           | 4.52         | 123.0430 | 122.0347 | 151.0409 | -        | [7]       |
| 2  | 4-O-methyl-D-glucuronic acid          | C <sub>7</sub> H <sub>12</sub> O <sub>7</sub>    | 208.0583          | 207.0510           | 2.14         | -        | -        | -        | -        | [71]      |
| 3  | Vicenin 2                             | C <sub>27</sub> H <sub>30</sub> O <sub>15</sub>  | 594.1585          | 593.1512           | 4.35         | 353.0645 | 383.0761 | 473.1053 | -        | [68]      |
| 4  | Scolymoside (luteolin 7-rutinoside)   | C <sub>27</sub> H <sub>30</sub> O <sub>15</sub>  | 594.1585          | 593.1512           | 6.98         | -        | -        | -        | -        | [70]      |
| 5  | Quercetin 3-O-glucoside               | C <sub>21</sub> H <sub>20</sub> O <sub>12</sub>  | 464.0955          | 463.0882           | 5.91         | 300.0257 | 301.0313 | 271.0222 |          | [68]      |
| 6  | Chrysoeriol-7-O-glucoside             | C <sub>22</sub> H <sub>22</sub> O <sub>11</sub>  | 462.1162          | 461.1089           | 7.09         | -        | -        | -        | -        | [13]      |
| 7  | luteolin -4 glucoside                 | C <sub>21</sub> H <sub>20</sub> O <sub>11</sub>  | 448.1011          | 447.0933           | 6.54         | 285.0384 | 284.0320 | 286.0395 | -        | [59]      |
| 8  | luteolin -8 glucoside                 | C <sub>21</sub> H <sub>20</sub> O <sub>11</sub>  | 448.1011          | 447.0933           | 4.79         | 285.0384 | 284.0320 | 286.0395 | -        | [59]      |
| 9  | luteolin -3 glucoside                 | C <sub>21</sub> H <sub>20</sub> O <sub>12</sub>  | 448.1011          | 447.0933           | 6.58         | 285.0384 | 284.0320 | 286.0395 | -        | [59]      |
| 10 | Berchemol                             | C <sub>20</sub> H <sub>24</sub> O <sub>7</sub>   | 376.1522          | 375.1449           | 8.73         | -        | -        | -        | -        | [71]      |
| 11 | Oleuropein diglucoside                | C <sub>31</sub> H <sub>42</sub> O <sub>18</sub>  | 702.2371          | 701.2298           | -            | 341.0000 | 539.0000 | 377.0000 | 307.0000 | [16]      |
| 12 | nuzhenide                             | C <sub>31</sub> H <sub>42</sub> O <sub>17</sub>  | 686.2422          | 685.2349           | 9.4          | 453.1389 | 421.1495 | 299.1130 | 523.1809 | [58]      |
| 13 | dihydrooleuropein                     | C <sub>25</sub> H <sub>36</sub> O <sub>13</sub>  | 544.2155          | 543.2083           | -            | 525.1980 | 513.1982 | -        | -        | [42]      |
| 14 | Hydroxytyrosol acyclodihydroelenolate | C <sub>19</sub> H <sub>26</sub> O <sub>8</sub>   | 382.1628          | 381.1555           | -            | 363.1450 | 349.1289 | 331.1185 | 213.0761 | [42]      |
| 15 | Isoverbascoside                       | C <sub>29</sub> H <sub>36</sub> O <sub>15</sub>  | 624.2054          | 623.1981           | 8.49         | 461.1659 | 161.0242 | -        | -        | [58]      |
| 16 | Caffeoyl-6'-secologanoside            | C <sub>25</sub> H <sub>28</sub> O <sub>14</sub>  | 552.1479          | 551.1406           | -            | -        | -        | -        | -        | [42]      |
| 17 | Comselogoside                         | C <sub>25</sub> H <sub>28</sub> O <sub>13</sub>  | 536.1530          | 535.1457           | -            | 491.1560 | 265.0728 | -        | -        | [42]      |
| 18 | Hydroxytyrosol-1-β-glucoside          | C <sub>14</sub> H <sub>20</sub> O <sub>8</sub>   | 316.1158          | 315.1085           | 4.95         | 153.0557 | 123.0451 | -        | -        | [45]      |
| 19 | Hydroxytyrosol-3-β-glucoside          | C <sub>14</sub> H <sub>20</sub> O <sub>8</sub>   | 316.1158          | 315.1085           | 5            | 153.0557 | 123.0451 | -        | -        | [45]      |
| 20 | tyrosol acetate                       | C <sub>10</sub> H <sub>12</sub> O <sub>3</sub>   | 180.0786          | 179.0714           | -            | -        | -        | -        | -        | [58]      |
| 21 | 3'-Hydroxybiphenyl-4-carboxylic acid  | C <sub>13</sub> H <sub>10</sub> O <sub>3</sub>   | 214.0630          | 213.0557           | 4.1          | -        | -        | -        | -        | [59]      |
| 22 | methyl gallate                        | C <sub>8</sub> H <sub>8</sub> O <sub>5</sub>     | 184.0372          | 183.0299           | 4.59         | 168.0045 | 124.0163 | -        | -        | [69]      |
| 23 | ellagic acid                          | C <sub>14</sub> H <sub>6</sub> O <sub>8</sub>    | 302.0063          | 300.9990           | 4.87         | 257.0084 | 229.0144 | -        | -        | [69]      |
| 24 | Brevifolincarboxylic acid             | C <sub>13</sub> H <sub>8</sub> O <sub>8</sub>    | 292.0219          | 291.0146           | 2.41         | -        | -        | -        | -        | [69]      |
| 25 | Delphinidin 3-glucoside               | C <sub>21</sub> H <sub>21</sub> O <sub>12+</sub> | 465.1028          | 464.0960           | 6.69         | -        | -        | -        | -        | [4]       |
| 26 | ethyl gallate                         | C <sub>9</sub> H <sub>10</sub> O <sub>5</sub>    | 198.0528          | 197.0455           | 5.14         | -        | -        | -        | -        | [69]      |
| 27 | kaempferol-7-O-hexoside               | C <sub>21</sub> H <sub>20</sub> O <sub>11</sub>  | 448.1006          | 447.0933           | 6.25         | 285.0393 | 284.0316 | 286.0423 | -        | [69]      |
| 28 | Galactosylglycerol                    | C <sub>9</sub> H <sub>18</sub> O <sub>8</sub>    | 254.1002          | 253.0929           | 3.27         | -        | -        | -        | -        | [72]      |
| 29 | 2,4,5-trihydroxypentanoic acid        | C <sub>5</sub> H <sub>10</sub> O <sub>5</sub>    | 150.0528          | 149.0455           | 1.77         | -        | -        | -        | -        | [72]      |
| 30 | glucaric acid                         | C <sub>6</sub> H <sub>10</sub> O <sub>8</sub>    | 210.0376          | 209.0303           | 1.64         | -        | -        | -        | -        | [72]      |
| 31 | ribonic acid                          | C <sub>5</sub> H <sub>10</sub> O <sub>6</sub>    | 166.0477          | 165.0405           | 1.48         | -        | -        | -        | -        | [72]      |
| 32 | heptanoic acid                        | C <sub>7</sub> H <sub>14</sub> O <sub>2</sub>    | 130.0994          | 129.0921           | 5.9          | -        | -        | -        | -        | [72]      |
| 33 | malonic acid                          | C <sub>3</sub> H <sub>4</sub> O <sub>4</sub>     | 104.0110          | 103.0037           | 0.98         | 59.0136  | -        | -        | -        | [72]      |
| 34 | fumaric acid                          | C <sub>4</sub> H <sub>4</sub> O <sub>4</sub>     | 116.0110          | 115.0037           | 2.06         | 71.0123  | -        | -        | -        | [72]      |
| 35 | elenolic acid methyl ester            | C <sub>12</sub> H <sub>16</sub> O <sub>6</sub>   | 256.0947          | 255.0874           | -            | -        | -        | -        | -        | [13]      |

|    |                                          |                                                 |          |          |       |          |          |          |          |      |
|----|------------------------------------------|-------------------------------------------------|----------|----------|-------|----------|----------|----------|----------|------|
| 36 | gallocatechin                            | C <sub>15</sub> H <sub>14</sub> O <sub>7</sub>  | 306.0740 | 305.0667 | 6.69  | 125.0249 | 137.0248 | 109.0295 | -        | [13] |
| 37 | Aromadedrin                              | C <sub>15</sub> H <sub>12</sub> O <sub>6</sub>  | 288.0634 | 287.0561 | 7.32  | -        | -        | -        | -        | [13] |
| 38 | acyclodihydroelenolic acid hexoside      | C <sub>17</sub> H <sub>28</sub> O <sub>11</sub> | 408.1632 | 407.1559 | -     | -        | -        | -        | -        | [13] |
| 39 | decarboxymethylelenolic acid             | C <sub>9</sub> H <sub>12</sub> O <sub>4</sub>   | 184.0736 | 183.0663 | -     | -        | -        | -        | -        | [13] |
| 40 | 2-phenethyl β-primeveroside              | C <sub>19</sub> H <sub>28</sub> O <sub>10</sub> | 416.1682 | 415.1610 | 5.19  | -        | -        | -        | -        | [13] |
| 41 | desoxyelenolic acid                      | C <sub>11</sub> H <sub>14</sub> O <sub>5</sub>  | 226.0841 | 225.0768 | -     | -        | -        | -        | -        | [13] |
| 42 | azelaic acid                             | C <sub>9</sub> H <sub>16</sub> O <sub>4</sub>   | 188.1049 | 187.0976 | 3.63  | -        | -        | -        | -        | [13] |
| 43 | acetylated hydroxytyrosol                | C <sub>10</sub> H <sub>12</sub> O <sub>4</sub>  | 196.0736 | 195.0663 | -     | -        | -        | -        | -        | [13] |
| 44 | Lucidumoside C                           | C <sub>27</sub> H <sub>36</sub> O <sub>14</sub> | 584.2105 | 583.2032 | 10.74 | -        | -        | -        | -        | [13] |
| 45 | trihydroxyoctadecenoic acid              | C <sub>18</sub> H <sub>34</sub> O <sub>5</sub>  | 330.2406 | 329.2333 | 7.03  | -        | -        | -        | -        | [13] |
| 46 | trihydroxyoctadecanoic acid              | C <sub>18</sub> H <sub>36</sub> O <sub>5</sub>  | 332.2563 | 331.2490 | 11.59 | -        | -        | -        | -        | [13] |
| 47 | methyldecarboxymethyloleuropein aglycone | C <sub>18</sub> H <sub>22</sub> O <sub>6</sub>  | 334.1416 | 333.1344 | -     | -        | -        | -        | -        | [13] |
| 48 | gingerol                                 | C <sub>17</sub> H <sub>26</sub> O <sub>4</sub>  | 294.1831 | 293.1758 | 10.28 | 193.0822 | 99.0798  | 57.0294  | -        | [13] |
| 49 | hydroxyoctadecatrienoic acid             | C <sub>18</sub> H <sub>30</sub> O <sub>3</sub>  | 294.2195 | 293.2122 | 10.25 | -        | -        | -        | -        | [13] |
| 50 | dihydroxyoctadecanoic acid               | C <sub>18</sub> H <sub>36</sub> O <sub>4</sub>  | 316.2614 | 315.2541 | 12.55 | -        | -        | -        | -        | [13] |
| 51 | hydroxyoctadecadienoic acid              | C <sub>18</sub> H <sub>31</sub> O <sub>3</sub>  | 295.2273 | 294.2200 | 10.34 | -        | -        | -        | -        | [13] |
| 52 | dihydroxyoctadecadienoic acid            | C <sub>18</sub> H <sub>32</sub> O <sub>4</sub>  | 312.2301 | 311.2228 | -     | -        | -        | -        | -        | [13] |
| 53 | hydroxyoctadecenoic acid                 | C <sub>18</sub> H <sub>34</sub> O <sub>3</sub>  | 298.2508 | 297.2435 | 10.39 | -        | -        | -        | -        | [13] |
| 54 | hydroxyoctadecanoic acid                 | C <sub>18</sub> H <sub>36</sub> O <sub>3</sub>  | 300.2664 | 299.2592 | 13.07 | -        | -        | -        | -        | [13] |
| 55 | fustin                                   | C <sub>15</sub> H <sub>12</sub> O <sub>6</sub>  | 288.0634 | 287.0561 | 6.86  | -        | -        | -        | -        | [47] |
| 56 | Chrysoeriol                              | C <sub>16</sub> H <sub>12</sub> O <sub>6</sub>  | 300.0634 | 299.0561 | 8.02  | 284.0300 | 285.0330 | -        | -        | [58] |
| 57 | caffeoylquinic acid                      | C <sub>16</sub> H <sub>18</sub> O <sub>9</sub>  | 354.0951 | 353.0878 | 3.7   | 191.0353 | 179.0331 | -        | -        | [20] |
| 58 | phloretic acid                           | C <sub>9</sub> H <sub>10</sub> O <sub>3</sub>   | 166.0630 | 165.0557 | 4.88  | 106.0358 | 119.0433 | 101.0310 | 91.0483  | [1]  |
| 59 | 3-(3,4-Dihydroxyphenyl)propanoic acid    | C <sub>9</sub> H <sub>10</sub> O <sub>4</sub>   | 182.0579 | 181.0506 | -     | -        | -        | -        | -        | [1]  |
| 60 | p-Hydroxyphenylacetic acid               | C <sub>8</sub> H <sub>8</sub> O <sub>3</sub>    | 152.0473 | 151.0401 | 3.97  | 107.0507 | 107.0628 | 151.0414 | 79.0549  | [1]  |
| 61 | 3,4-Dihydroxyphenylacetic acid           | C <sub>8</sub> H <sub>8</sub> O <sub>4</sub>    | 168.0423 | 167.0350 | -     | 121.0259 | 59.9842  | 59.9972  | -        | [1]  |
| 62 | Demethyloleuropein                       | C <sub>24</sub> H <sub>30</sub> O <sub>13</sub> | 526.1686 | 525.1614 | 7.37  | -        | -        | -        | -        | [10] |
| 63 | dimethyloleuropein aglycone              | C <sub>21</sub> H <sub>26</sub> O <sub>8</sub>  | 406.1628 | 405.1555 | 5.8   | -        | -        | -        | --       | [13] |
| 64 | salidroside                              | C <sub>14</sub> H <sub>20</sub> O <sub>7</sub>  | 300.1209 | 299.1136 | 4.85  | 89.0237  | 59.0141  | 71.0134  | 119.0477 | [10] |
| 65 | cyanidin-3-O-b-D-glucoside               | C <sub>21</sub> H <sub>22</sub> O <sub>11</sub> | 450.1162 | 449.1089 | 7.05  | 284.0333 | 285.0389 | 256.0362 |          | [59] |
| 66 | Cyanidin 3-rutinoside                    | C <sub>27</sub> H <sub>32</sub> O <sub>15</sub> | 596.1741 | 595.1668 | 7.26  | 284.0319 | 285.0360 | 285.0490 | -        | [59] |
| 67 | Luteolin 7-glucoside                     | C <sub>21</sub> H <sub>20</sub> O <sub>11</sub> | 448.1006 | 447.0933 | 6.61  | 285.0384 | 284.0320 | 286.0395 | -        | [7]  |
| 68 | Hydroxytyrosol 4'-O-glucoside            | C <sub>14</sub> H <sub>20</sub> O <sub>8</sub>  | 316.1158 | 315.1085 | 5.51  | 153.0557 | -        | -        | -        | [10] |
| 69 | Quercitrin                               | C <sub>21</sub> H <sub>20</sub> O <sub>11</sub> | 448.1006 | 447.0933 | 7.03  | 300.0278 | 301.0345 | 271.0250 | -        | [8]  |
| 70 | Apigenin 7-glucoside                     | C <sub>21</sub> H <sub>20</sub> O <sub>10</sub> | 432.1056 | 431.0984 | 6.39  | 268.0356 | 269.0418 | -        | -        | [10] |
| 71 | oleuroside                               | C <sub>25</sub> H <sub>32</sub> O <sub>13</sub> | 540.1843 | 539.1770 | 9.35  | -        | -        | -        | -        | [47] |
| 72 | b-tocotrienol                            | C <sub>26</sub> H <sub>38</sub> O <sub>2</sub>  | 382.2872 | 381.2799 | 13.19 | -        | -        | -        | -        | [9]  |
| 73 | a tocopherol                             | C <sub>29</sub> H <sub>50</sub> O <sub>2</sub>  | 430.3811 | 429.3738 | 12.61 | -        | -        | -        | -        | [9]  |
| 74 | g tocopherol                             | C <sub>29</sub> H <sub>48</sub> O <sub>2</sub>  | 428.3654 | 427.3582 | 12.74 | -        | -        | -        | -        | [9]  |

|     |                                          |                                                               |           |           |       |          |          |          |          |      |
|-----|------------------------------------------|---------------------------------------------------------------|-----------|-----------|-------|----------|----------|----------|----------|------|
| 75  | retinol                                  | C <sub>20</sub> H <sub>30</sub> O                             | 286.2297  | 285.2224  | 11.81 | -        | -        | -        | -        | [9]  |
| 76  | thiamine                                 | C <sub>12</sub> H <sub>17</sub> N <sub>4</sub> OS             | 401.0978  | 400.0905  | -     | 147.0690 | 148.0706 | 234.0926 | -        | [9]  |
| 77  | rivoflavin                               | C <sub>17</sub> H <sub>20</sub> N <sub>4</sub> O <sub>6</sub> | 376.1383  | 375.1310  | -     | 255.0938 | 375.1325 | -        | -        | [9]  |
| 78  | ascorbic acid                            | C <sub>6</sub> H <sub>8</sub> O <sub>6</sub>                  | 176.0321  | 175.0248  | -     | 87.0078  | -        | -        | -        | [9]  |
| 79  | b carotene                               | C <sub>40</sub> H <sub>56</sub>                               | 536.4382  | 535.4309  | -     | -        | -        | -        | -        | [9]  |
| 80  | Isorhoifolin                             | C <sub>40</sub> H <sub>56</sub> O <sub>3</sub>                | 584.4229  | 583.4157  | 6.81  | 577.1702 | 269.0475 | 270.0497 | -        | [10] |
| 81  | Peonidin 3-glucoside                     | C <sub>22</sub> H <sub>23</sub> ClO <sub>11</sub>             | 498.0929  | 497.0856  | 7.6   | 299.0539 | 283.0263 | 298.0415 | -        | [10] |
| 82  | Delphinidin-3-rhamnoglucoside            | C <sub>27</sub> H <sub>31</sub> ClO <sub>15</sub>             | 630.1351  | 629.1279  | 5.6   | -        | -        | -        | -        | [10] |
| 83  | Hexahydroxydiphenoyl hexosyl-gallate     | C <sub>27</sub> H <sub>22</sub> O <sub>18</sub>               | 634.0806  | 633.0733  | -     | 463.0504 | 301.9971 | -        | -        | [12] |
| 84  | hydrooleuropein                          | C <sub>30</sub> H <sub>22</sub> O <sub>10</sub>               | 542.1213  | 541.1140  | -     | 415.0819 | 389.1018 | -        | -        | [12] |
| 85  | oleoside 11 methyl ester                 | C <sub>17</sub> H <sub>24</sub> O <sub>11</sub>               | 404.1319  | 403.1246  | 4.85  | 223.0612 | -        | -        | -        | [19] |
| 86  | succinic acid                            | C <sub>4</sub> H <sub>6</sub> O <sub>4</sub>                  | 118.0266  | 117.0193  | 1.29  | 73.0130  | -        | -        | -        | [19] |
| 87  | oxalic acid                              | C <sub>2</sub> H <sub>2</sub> O <sub>4</sub>                  | 89.9953   | 88.9880   | 0.83  | -        | -        | -        | -        | [72] |
| 88  | diosmetin -7 glucoside                   | C <sub>22</sub> H <sub>22</sub> O <sub>11</sub>               | 462.1162  | 461.1089  | 7.02  | -        | -        | -        | -        | [2]  |
| 89  | oleoside                                 | C <sub>16</sub> H <sub>22</sub> O <sub>11</sub>               | 390.1162  | 389.1089  | 5.8   | 345.1176 | 209.0460 | 165.0558 | 183.0666 | [57] |
| 90  | glucosyl methyl oleoside                 | C <sub>23</sub> H <sub>34</sub> O <sub>16</sub>               | 566.1847  | 565.1774  | -     | -        | -        | -        | -        | [57] |
| 91  | Aesculetin                               | C <sub>9</sub> H <sub>6</sub> O <sub>4</sub>                  | 178.0266  | 177.0193  | 3.93  | 177.0206 | 133.0298 | 105.0349 | -        | [13] |
| 92  | Aesculin                                 | C <sub>15</sub> H <sub>16</sub> O <sub>9</sub>                | 340.0794  | 339.0722  | 3.42  | 177.0197 | -        | -        | -        | [13] |
| 93  | dehydrooleuropein aglycone               | C <sub>19</sub> H <sub>20</sub> O <sub>8</sub>                | 376.1158  | 375.1085  | -     | -        | -        | -        | -        | [13] |
| 94  | hydroxyelenolic acid                     | C <sub>11</sub> H <sub>14</sub> O <sub>7</sub>                | 258.0740  | 257.0667  | -     | -        | -        | -        | -        | [13] |
| 95  | erythrodil                               | C <sub>30</sub> H <sub>50</sub> O <sub>2</sub>                | 442.3811  | 441.3738  | 12.84 | -        | -        | -        | -        | [13] |
| 96  | uvaol                                    | C <sub>30</sub> H <sub>50</sub> O <sub>2</sub>                | 442.3811  | 441.3738  | 12.83 | -        | -        | -        | -        | [13] |
| 97  | octadecanoic acid                        | C <sub>18</sub> H <sub>36</sub> O <sub>2</sub>                | 284.2715  | 283.2643  | 13.07 | -        | -        | -        | -        | [13] |
| 98  | oleic acid                               | C <sub>18</sub> H <sub>34</sub> O <sub>2</sub>                | 282.2559  | 281.2486  | 13.28 | -        | -        | -        | -        | [13] |
| 99  | linoleic acid                            | C <sub>18</sub> H <sub>32</sub> O <sub>2</sub>                | 280.2402  | 279.2330  | 12.92 | -        | -        | -        | -        | [13] |
| 100 | linolenic acid                           | C <sub>18</sub> H <sub>30</sub> O <sub>2</sub>                | 278.2246  | 277.2173  | 12.37 | -        | -        | -        | -        | [13] |
| 101 | palmitic acid                            | C <sub>16</sub> H <sub>32</sub> O <sub>2</sub>                | 256.2402  | 255.2330  | 12.94 | -        | -        | -        | -        | [13] |
| 102 | palmitoleic acid                         | C <sub>16</sub> H <sub>30</sub> O <sub>2</sub>                | 254.2246  | 253.2173  | 12.44 | 217.8511 | 181.1071 | -        | -        | [13] |
| 103 | 10 hydroxydecanoic acid                  | C <sub>10</sub> H <sub>20</sub> O <sub>3</sub>                | 188.1412  | 187.1340  | 6.49  | 141.1290 | 169.1254 | -        | -        | [13] |
| 104 | 9-Hydroxy-10.12.15-octadecatrienoic acid | C <sub>18</sub> H <sub>30</sub> O <sub>3</sub>                | 294.2195  | 293.2122  | -     | -        | -        | -        | -        | [13] |
| 105 | (S)-10.16-Dihydroxyhexadecanoic acid     | C <sub>16</sub> H <sub>32</sub> O <sub>4</sub>                | 288.2301  | 287.2228  | -     | -        | -        | -        | -        | [13] |
| 106 | 18-trihydroxyoctadecadienoic acid        | C <sub>18</sub> H <sub>32</sub> O <sub>5</sub>                | 328.2250  | 327.2177  | 9.05  | -        | -        | -        | -        | [13] |
| 107 | 9.10.13-Trihydroxy-11-octadecenoic acid  | C <sub>18</sub> H <sub>34</sub> O <sub>5</sub>                | 330.2406  | 329.2333  | -     | -        | -        | -        | -        | [13] |
| 108 | methoxynuzhenide                         | C <sub>32</sub> H <sub>44</sub> O <sub>18</sub>               | 716.2528  | 715.2455  | -     | -        | -        | -        | -        | [16] |
| 109 | methoxynuzhenide 11 methyl oleoside      | C <sub>49</sub> H <sub>66</sub> O <sub>28</sub>               | 1102.3741 | 1101.3668 | -     | 715.2449 | 553.1921 | 329.1236 | -        | [16] |
| 110 | methoxyoleuropein                        | C <sub>26</sub> H <sub>34</sub> O <sub>14</sub>               | 570.1949  | 569.1876  | -     | -        | -        | -        | -        | [47] |
| 111 | Forsythiaside                            | C <sub>29</sub> H <sub>36</sub> O <sub>15</sub>               | 624.2054  | 623.1981  | 8.45  | -        | -        | -        | -        | [47] |
| 112 | Homovanillyl alcohol                     | C <sub>9</sub> H <sub>12</sub> O <sub>3</sub>                 | 168.0786  | 167.0714  | 6.29  | -        | -        | -        | -        | [47] |

|     |                                                   |                                                   |          |          |       |          |          |          |          |      |
|-----|---------------------------------------------------|---------------------------------------------------|----------|----------|-------|----------|----------|----------|----------|------|
| 113 | Dimeresculetin                                    | C <sub>8</sub> H <sub>10</sub> O <sub>8</sub>     | 234.0376 | 233.0303 | -     | -        | -        | -        | -        | [47] |
| 114 | scopoletin                                        | C <sub>10</sub> H <sub>8</sub> O <sub>4</sub>     | 192.0423 | 191.0350 | 4.84  | 176.0112 | 177.0153 | 148.0166 | -        | [47] |
| 115 | Naringenin 4'-O-glucoside                         | C <sub>21</sub> H <sub>22</sub> O <sub>10</sub>   | 434.1213 | 433.1140 | 5.95  | 271.0573 | 150.9990 | 119.0464 | -        | [47] |
| 116 | hesperidin                                        | C <sub>28</sub> H <sub>34</sub> O <sub>15</sub>   | 610.1898 | 609.1825 | -     | 301.0718 | -        | -        | -        | [47] |
| 117 | cyanidin                                          | C <sub>15</sub> H <sub>11</sub> O <sub>6</sub>    | 287.0556 | 286.0483 | -     | 183.0410 | 159.0414 | 211.0360 | 239.0319 | [58] |
| 118 | cyanidin chloride                                 | C <sub>15</sub> H <sub>11</sub> ClO <sub>6</sub>  | 322.0244 | 321.0171 | 7.72  | -        | -        | -        | -        | [43] |
| 119 | cyanidin 3 glucoside chloride                     | C <sub>21</sub> H <sub>21</sub> ClO <sub>11</sub> | 484.0772 | 483.0700 | 7.05  | -        | -        | -        | -        | [43] |
| 120 | Isoorientin                                       | C <sub>21</sub> H <sub>20</sub> O <sub>11</sub>   | 448.1006 | 447.0933 | 5.07  | 357.0615 | 358.0641 |          | -        | [43] |
| 121 | hydroxyeicosanoic acid                            | C <sub>20</sub> H <sub>40</sub> O <sub>3</sub>    | 328.2977 | 327.2905 | 13.86 | -        | -        | -        | -        | [13] |
| 122 | ursolic acid                                      | C <sub>30</sub> H <sub>48</sub> O <sub>3</sub>    | 456.3603 | 455.3531 | 12.31 | -        | -        | -        | -        | [13] |
| 123 | hydroxytyrosol acetate                            | C <sub>10</sub> H <sub>12</sub> O <sub>4</sub>    | 196.0736 | 195.0663 | 6.44  | -        | -        | -        | -        | [58] |
| 124 | elenolic acid                                     | C <sub>11</sub> H <sub>14</sub> O <sub>6</sub>    | 242.0790 | 241.0718 | 3.4   | 95.0496  | 127.0400 | 151.0402 | 171.0300 | [13] |
| 125 | Hydroxylated form of elenolic acid                | C <sub>11</sub> H <sub>14</sub> O <sub>7</sub>    | 258.0740 | 257.0667 | -     | 137.0603 | 181.0535 | -        | -        | [42] |
| 126 | 10-Hydroxy decarboxymethyl<br>oleuropein aglycone | C <sub>17</sub> H <sub>20</sub> O <sub>7</sub>    | 336.1209 | 335.1136 | -     | 85.0296  | 121.0292 | 151.0401 | 153.0557 | [13] |
| 127 | 10-hydroxy oleuropein aglycone                    | C <sub>19</sub> H <sub>22</sub> O <sub>9</sub>    | 394.1264 | 393.1191 | -     | 137.0244 | 181.0502 | -        | -        | [13] |
| 128 | Methyl oleuropein aglycone                        | C <sub>20</sub> H <sub>24</sub> O <sub>8</sub>    | 392.1471 | 391.1398 | -     | 111.0087 | 137.0608 | 291.0875 | 67.0192  | [13] |
| 129 | 1-Acetoxypinoresinol                              | C <sub>22</sub> H <sub>24</sub> O <sub>8</sub>    | 416.1471 | 415.1398 | 8.18  | 151.0402 | 280.0951 | 343.1188 | -        | [13] |
| 130 | Syringaresinol                                    | C <sub>22</sub> H <sub>26</sub> O <sub>8</sub>    | 418.1628 | 417.1555 | 9.14  | 127.0408 | 181.0506 | -        | -        | [13] |
| 131 | 1-Hydroxypinoresinol                              | C <sub>20</sub> H <sub>22</sub> O <sub>7</sub>    | 374.1366 | 373.1293 | 7.38  | 121.0294 | 151.0401 | 163.0402 | -        | [13] |

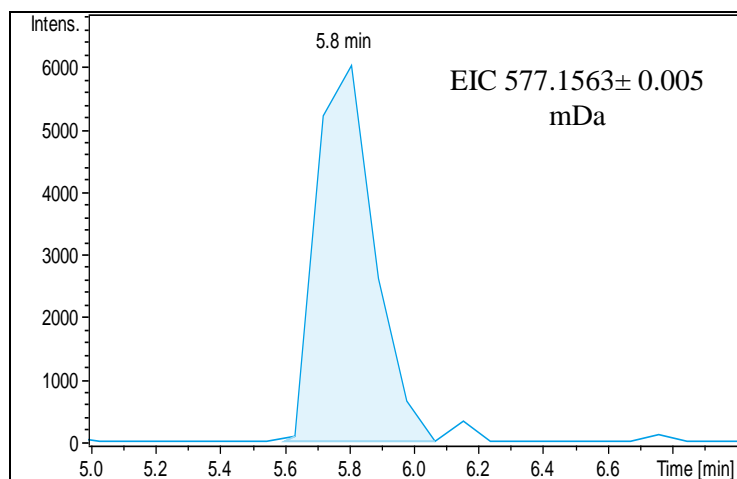

**Fig S1a.** EIC of m/z 577.1563 in an edible olive fruit

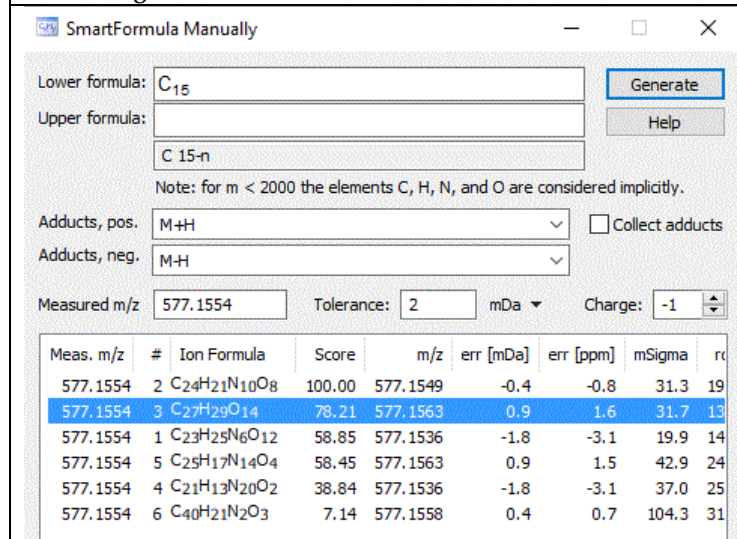

**Fig S1c.** Molecular Formula Annotation of m/z 593.1512

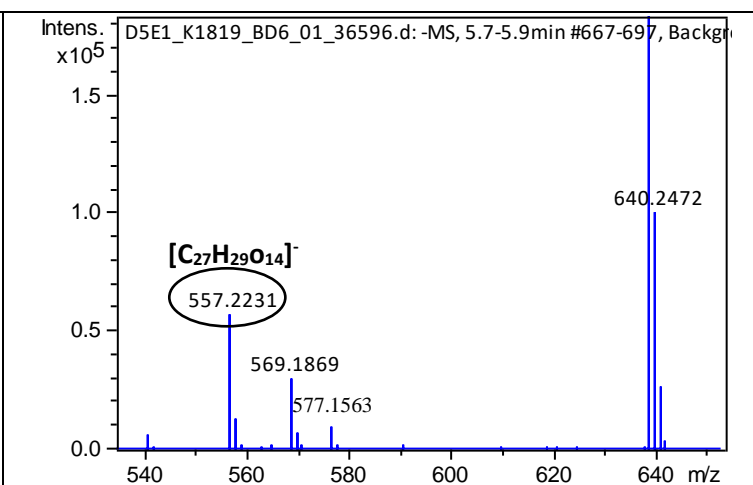

**Fig S1b.** Background subtracted MS Spectra from 5.7 to 5.8

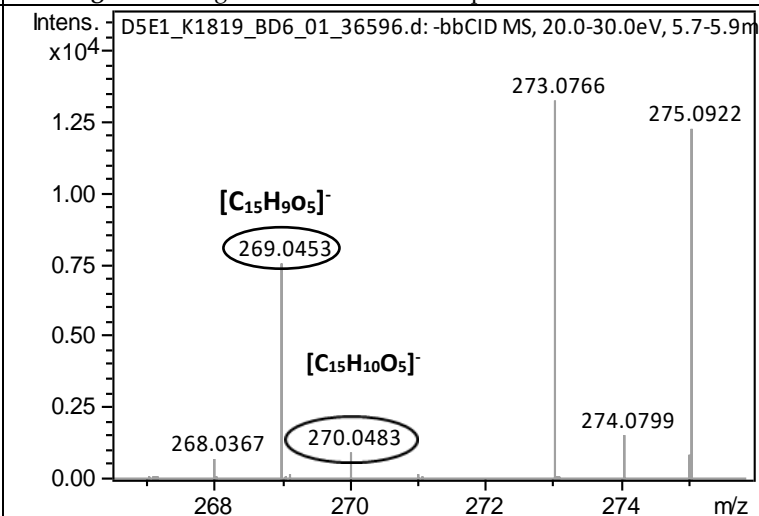

**Fig S1d.** Background subtracted MS/MS Spectra from 5.7 to 5.8

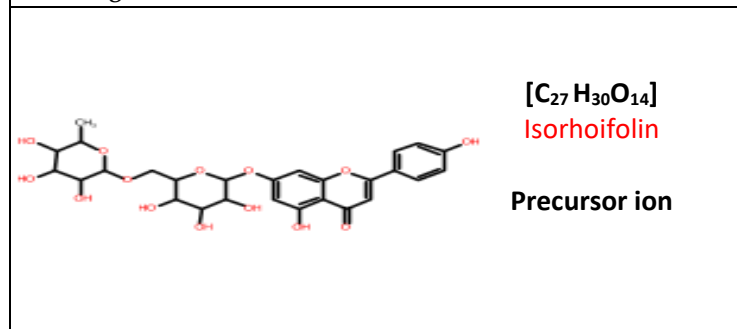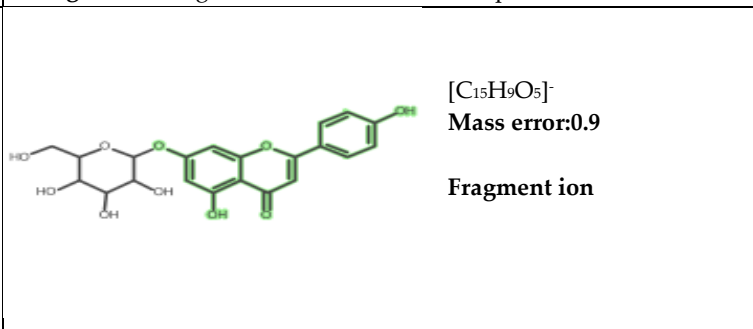

**Fig S1e.** Structures of precursor and fragment ions of isorhoifolin

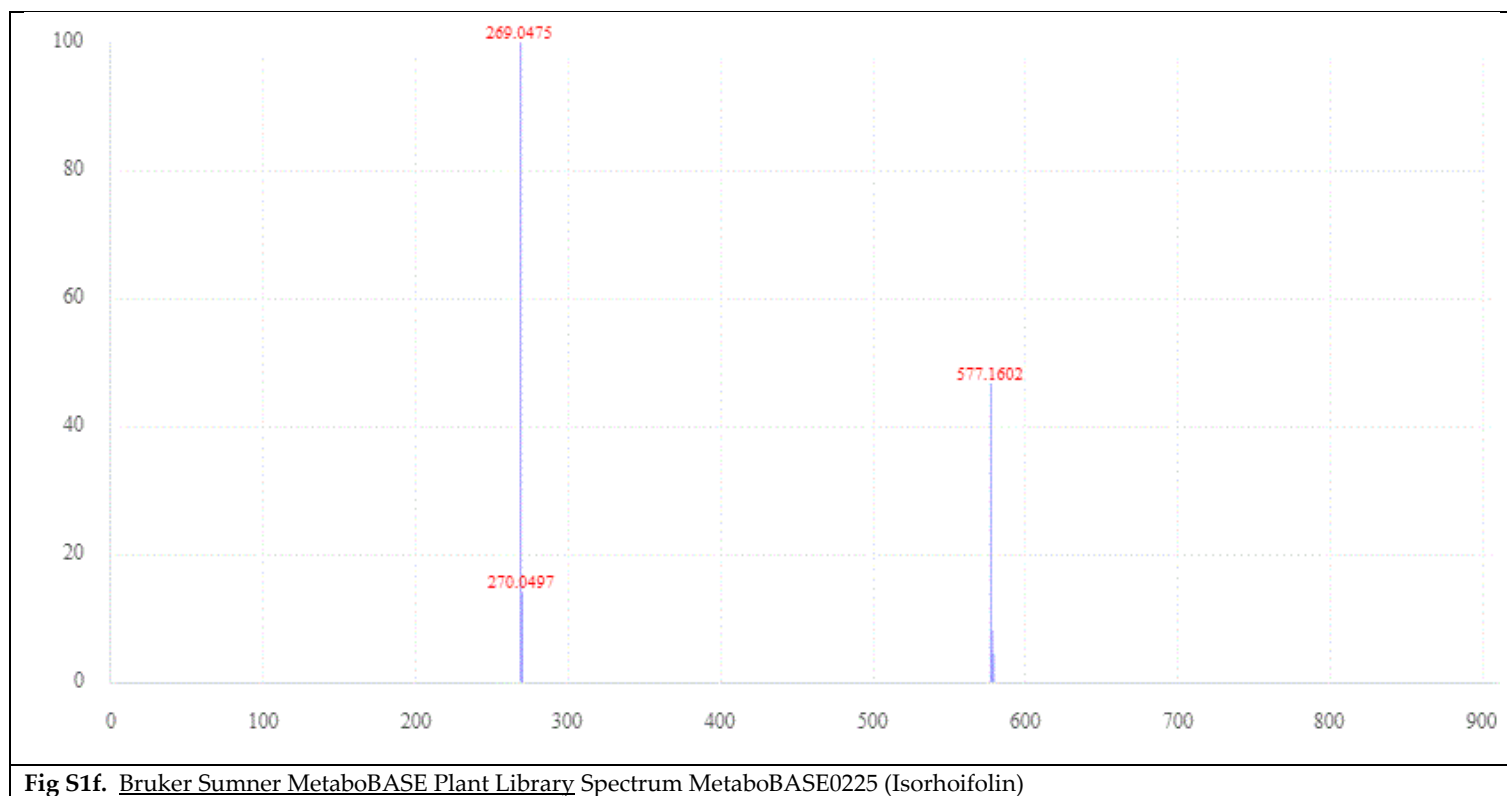

**Figure S1.** Identification data for the mass feature m/z 577.1602\_5.7 min (Isorhoifolin)

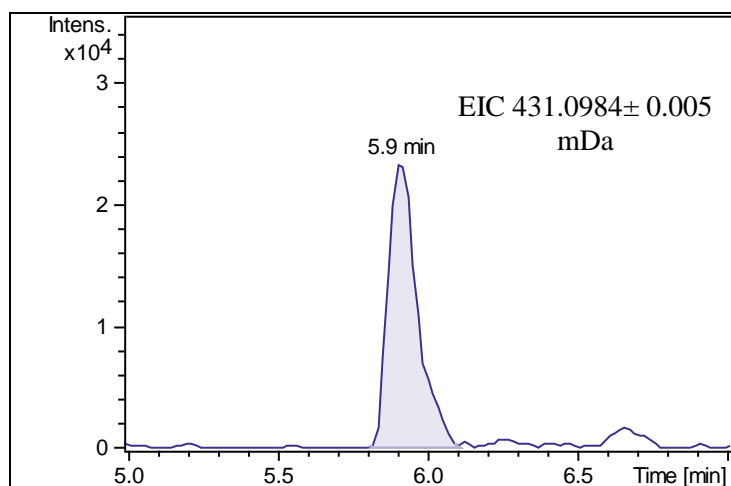

Fig S2a. EIC of m/z 431.0984 in an edible olive fruit

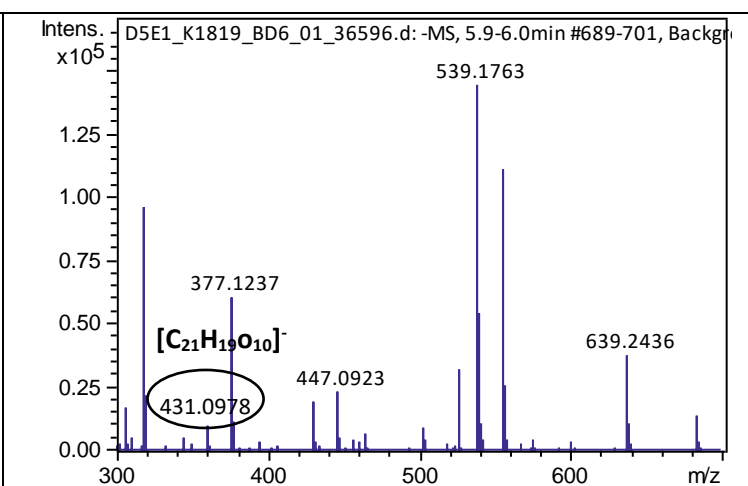

Fig S2b. Background subtracted MS Spectra from 5.9 to 6

SmartFormula Manually

Lower formula:

Upper formula:

Note: for m < 2000 the elements C, H, N, and O are considered implicitly.

Adducts, pos.  ☐ Collect adducts

Adducts, neg.

Measured m/z  Tolerance:  mDa Charge:

| Meas. m/z | # | Ion Formula                                                    | Score  | m/z      | err [mDa] | err [ppm] | mSigma | rc |
|-----------|---|----------------------------------------------------------------|--------|----------|-----------|-----------|--------|----|
| 431.0977  | 1 | C <sub>21</sub> H <sub>19</sub> O <sub>10</sub>                | 100.00 | 431.0984 | 0.6       | 1.5       | 30.8   | 12 |
| 431.0977  | 2 | C <sub>18</sub> H <sub>11</sub> N <sub>10</sub> O <sub>4</sub> | 64.33  | 431.0970 | -0.7      | -1.7      | 34.9   | 18 |
| 431.0977  | 3 | C <sub>19</sub> H <sub>7</sub> N <sub>14</sub>                 | 46.67  | 431.0984 | 0.6       | 1.4       | 48.4   | 23 |
| 431.0977  | 4 | C <sub>22</sub> H <sub>15</sub> N <sub>4</sub> O <sub>6</sub>  | 20.04  | 431.0997 | 2.0       | 4.6       | 48.5   | 17 |

Fig S2c. Molecular Formula Annotation of m/z 593.1512

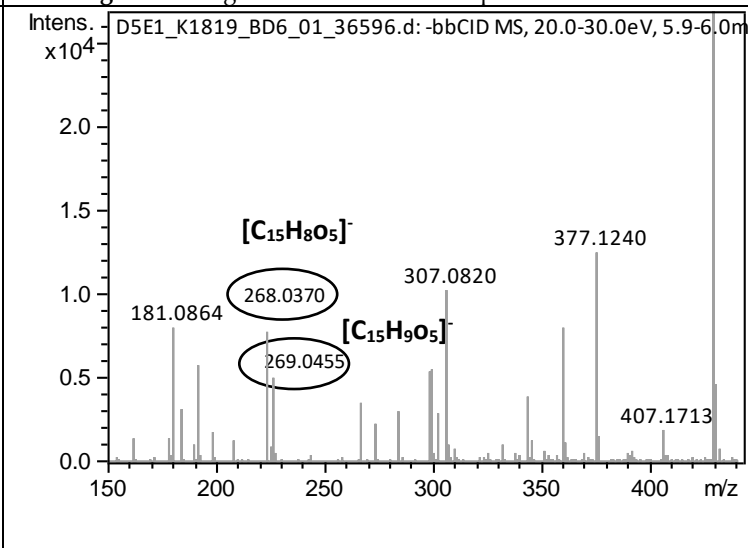

Fig S2d. Background subtracted MS/MS Spectra from 5.9 to 6

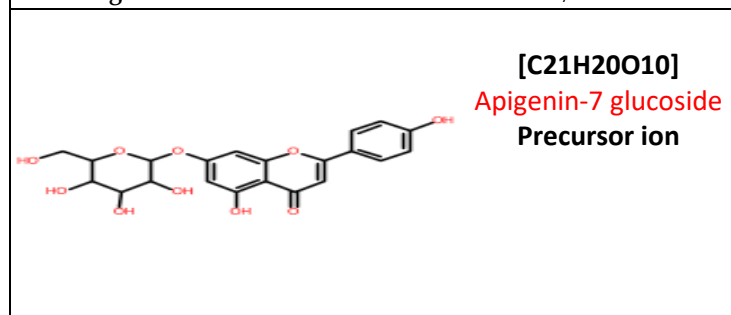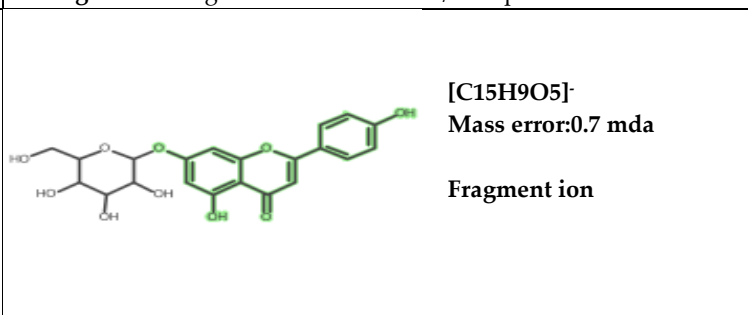

Fig S2e. Structures of precursor and fragment ions of Apigenin-7 glucoside

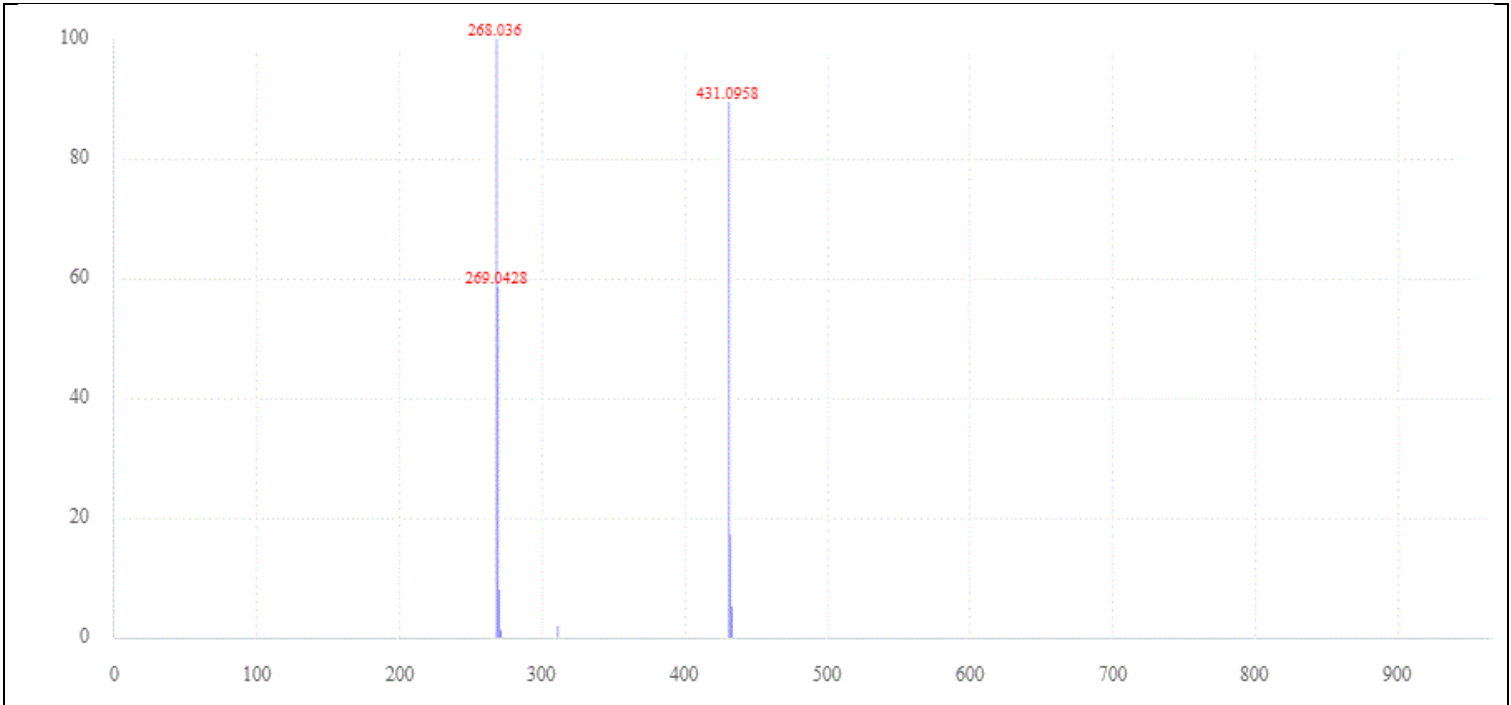

**Fig S2f.** Bruker Sumner MetaboBASE Plant Library Spectrum MetaboBASE0712 (apigenin-7 glucoside)

**Figure S2.** Identification data for the mass feature m/z 431.0984\_5.9 min (apigenin-7 glucoside)

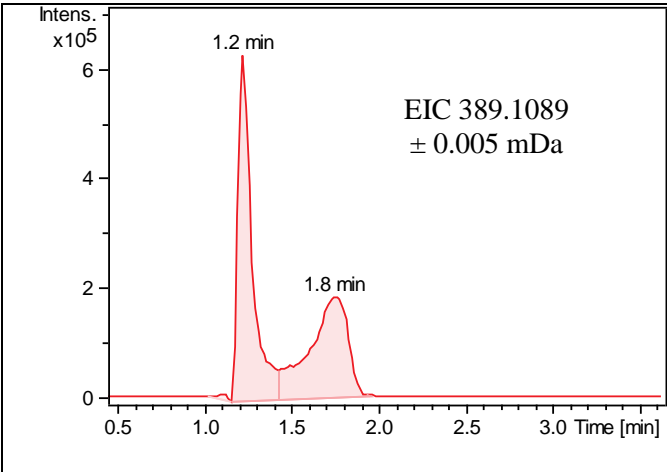

**Fig S3a.** EIC of m/z 389.1089 in an edible olive fruit

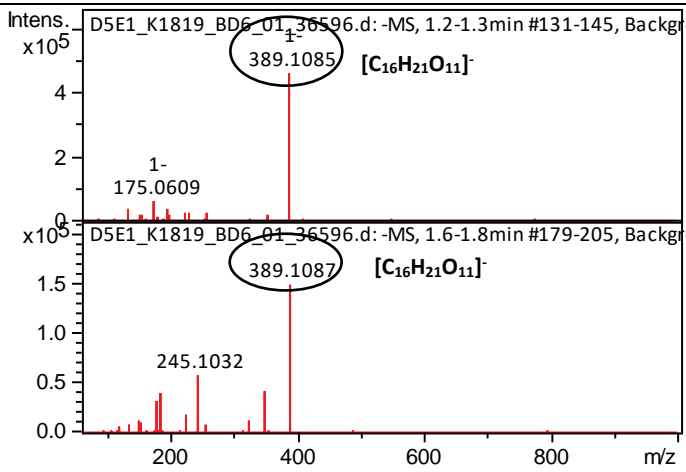

**Fig S3b.** Background subtracted MS Spectras from 1.2 to 1.3 min and from 1.6 to 1.8 min

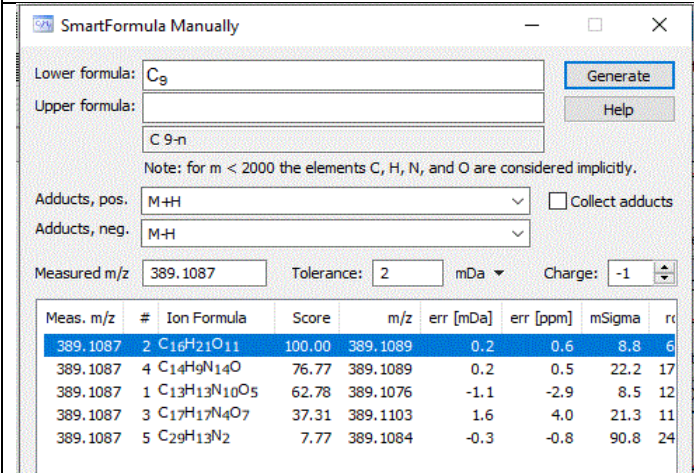

**Fig S3c.** Molecular Formula Annotation of m/z 389.1089

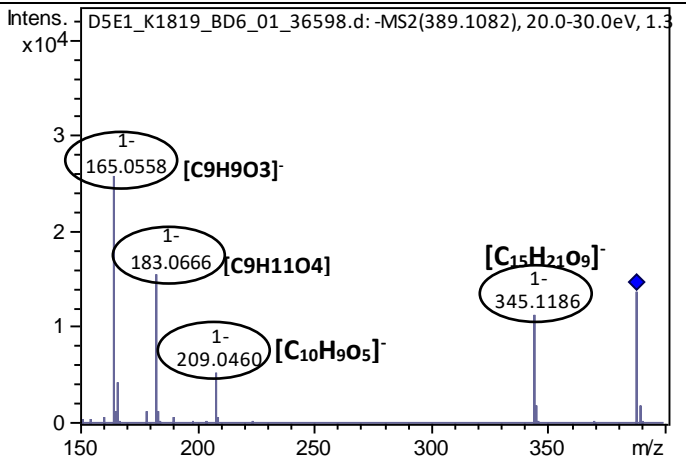

**Fig S3d.** Background subtracted MS/MS Spectra from 1.2 to 1.3 min



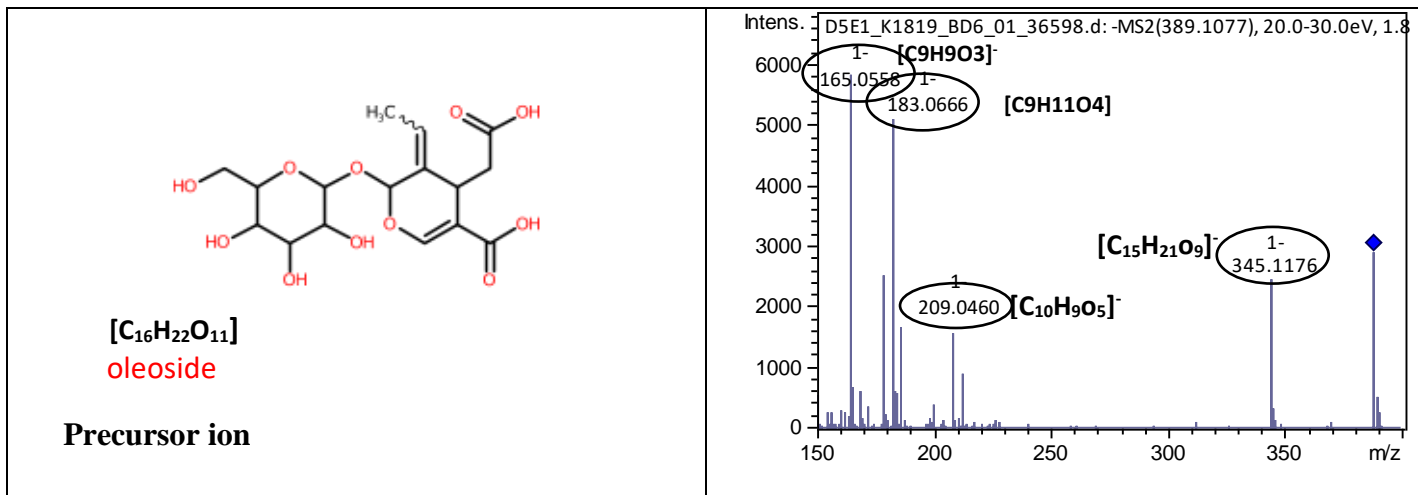

**Fig S3e.** Structures of precursor

**Fig S3f.** Background subtracted MS/MS Spectra from 1.6 to 1.8 min

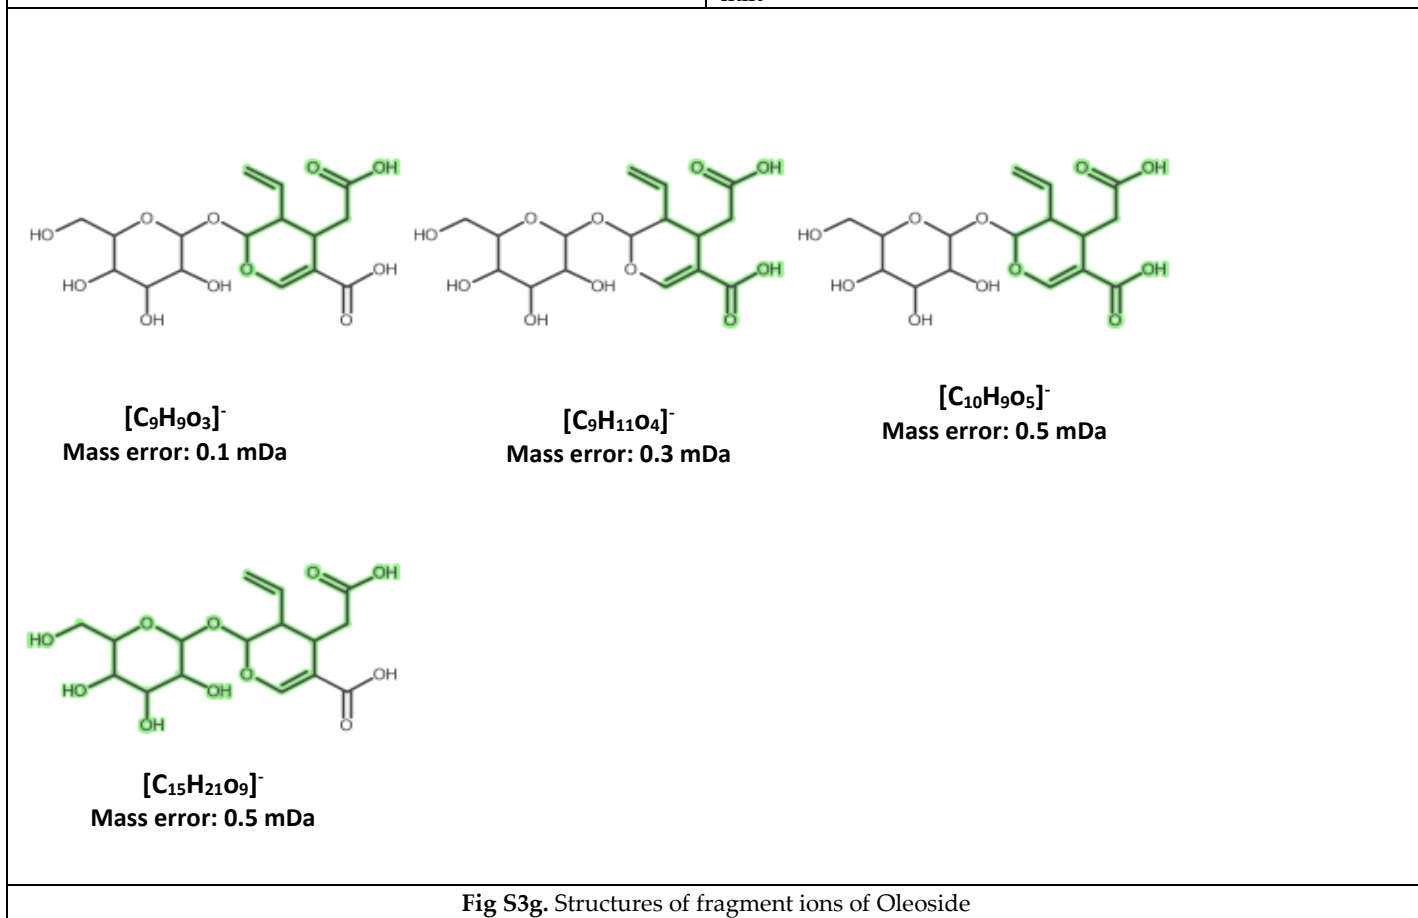

**Fig S3g.** Structures of fragment ions of Oleoside

**Figure S3.** Identification data for the mass feature m/z 389.1089\_1.8 min (oleoside)

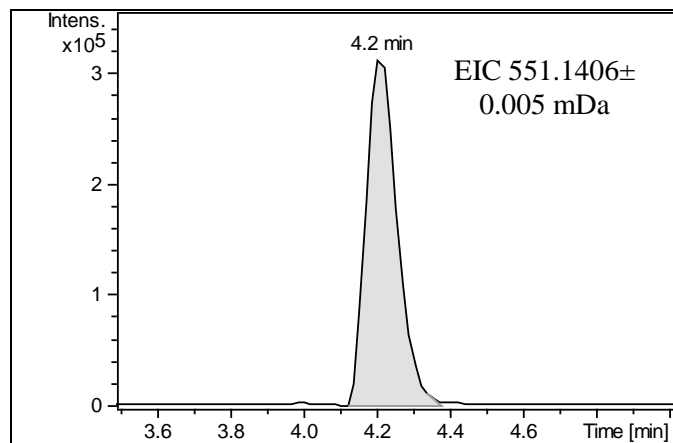

Fig S4a. EIC of m/z 447.0933 in an edible olive fruit

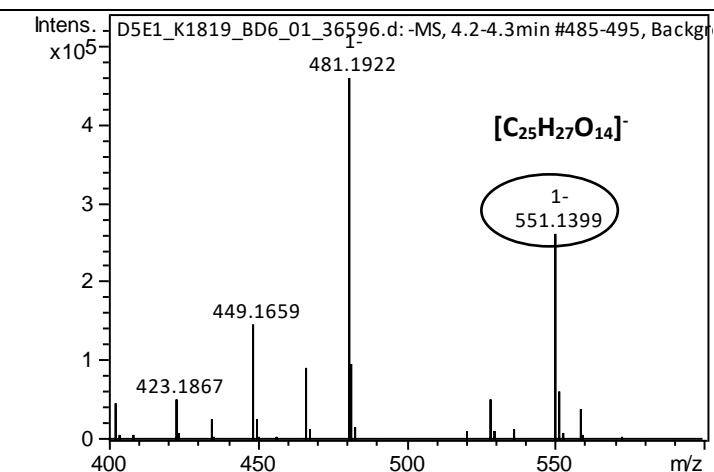

Fig S4b. Background subtracted MS Spectra from 4.2 to 4.3 min

SmartFormula Manually

Lower formula: C<sub>15</sub> Generate

Upper formula: C<sub>15</sub>-n Help

Note: for m < 2000 the elements C, H, N, and O are considered implicitly.

Adducts, pos: M+H Collect adducts

Adducts, neg: M-H

Measured m/z: 551.1399 Tolerance: 2 mDa Charge: -1

| Meas. m/z | # | Ion Formula                                                    | Score  | m/z      | err [mDa] | err [ppm] | mSigma | rc |
|-----------|---|----------------------------------------------------------------|--------|----------|-----------|-----------|--------|----|
| 551.1399  | 1 | C <sub>21</sub> H <sub>23</sub> N <sub>6</sub> O <sub>12</sub> | 53.02  | 551.1379 | -2.0      | -3.6      | 15.5   | 13 |
| 551.1399  | 2 | C <sub>22</sub> H <sub>19</sub> N <sub>10</sub> O <sub>8</sub> | 100.00 | 551.1393 | -0.7      | -1.2      | 25.3   | 18 |
| 551.1399  | 3 | C <sub>25</sub> H <sub>27</sub> O <sub>14</sub>                | 93.07  | 551.1406 | 0.7       | 1.3       | 27.7   | 12 |
| 551.1399  | 4 | C <sub>19</sub> H <sub>11</sub> N <sub>2</sub> O <sub>2</sub>  | 29.88  | 551.1379 | -2.0      | -3.6      | 28.2   | 24 |
| 551.1399  | 5 | C <sub>23</sub> H <sub>15</sub> N <sub>14</sub> O <sub>4</sub> | 75.31  | 551.1406 | 0.7       | 1.2       | 36.4   | 23 |
| 551.1399  | 6 | C <sub>26</sub> H <sub>23</sub> N <sub>4</sub> O <sub>10</sub> | 30.71  | 551.1420 | 2.0       | 3.7       | 37.8   | 17 |
| 551.1399  | 7 | C <sub>24</sub> H <sub>11</sub> N <sub>18</sub>                | 13.91  | 551.1420 | 2.0       | 3.7       | 55.2   | 28 |
| 551.1399  | 8 | C <sub>38</sub> H <sub>19</sub> N <sub>2</sub> O <sub>3</sub>  | 9.81   | 551.1401 | 0.2       | 0.3       | 98.9   | 30 |

Fig S4c. Molecular Formula Annotation of m/z 447.0933

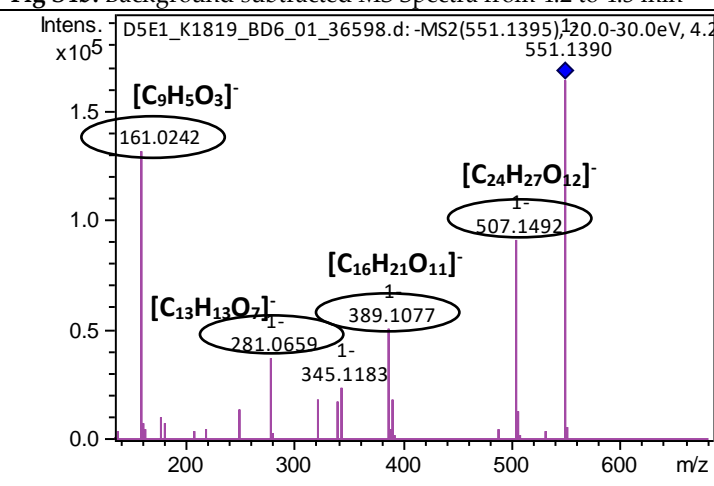

Fig S4d. Background subtracted MS/MS Spectra from 4.2 to 4.3 min

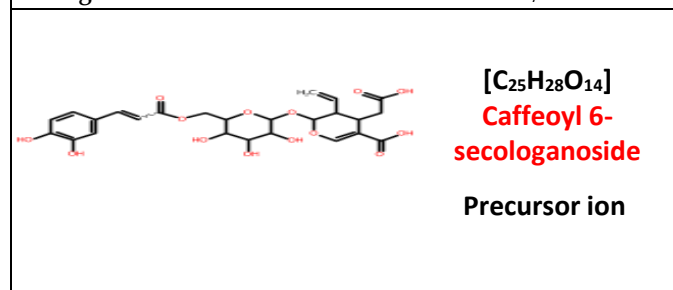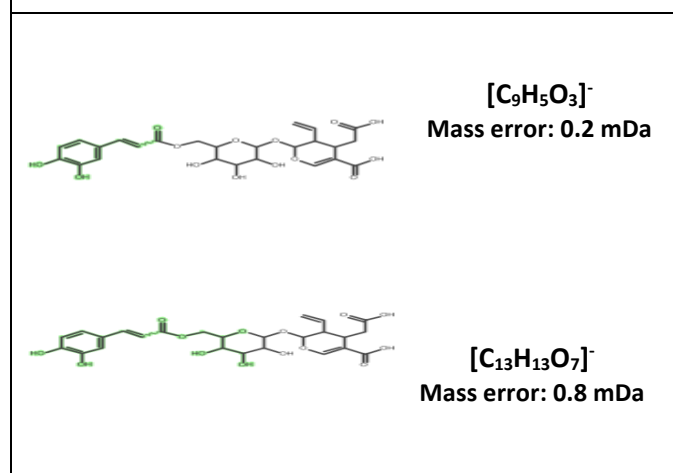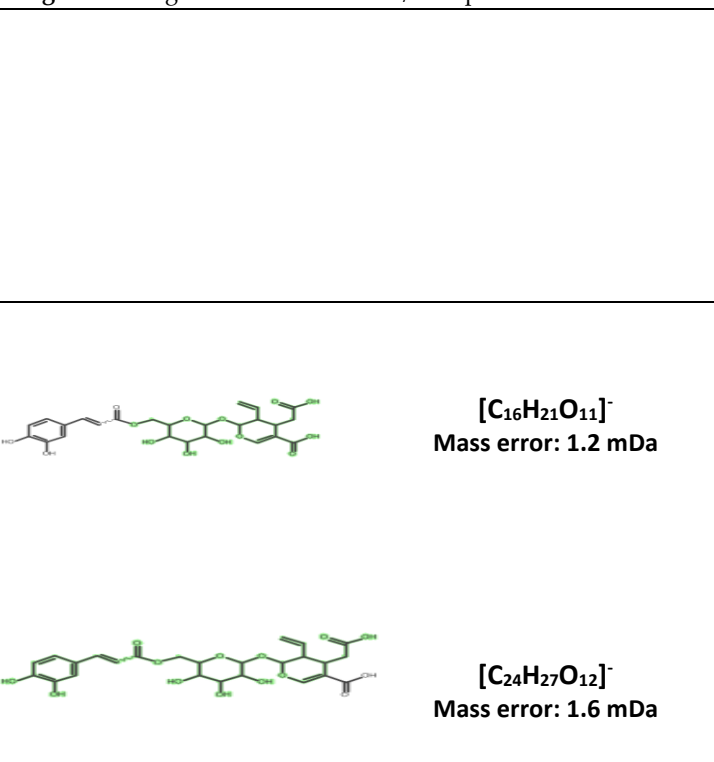

Fig S4e. Structure of precursor and fragment ions of Caffeoyl 6-secologanoside

Figure S4. Identification data for the mass feature m/z 551.1406\_4.2 min (caffeoyl 6-secologanoside)

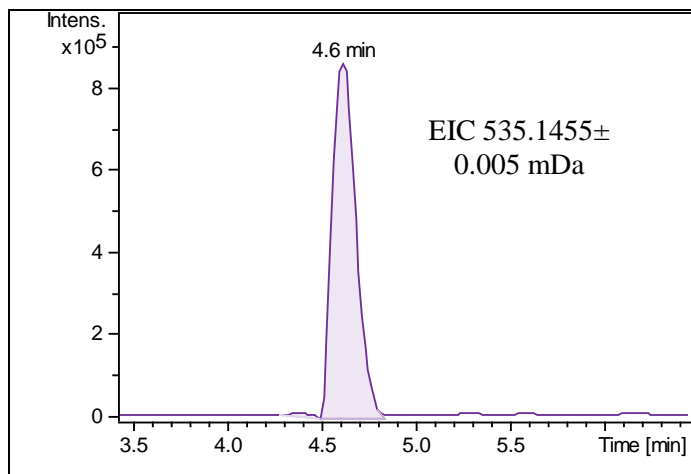

Fig S5a. EIC of m/z 535.1455 in an edible olive fruit

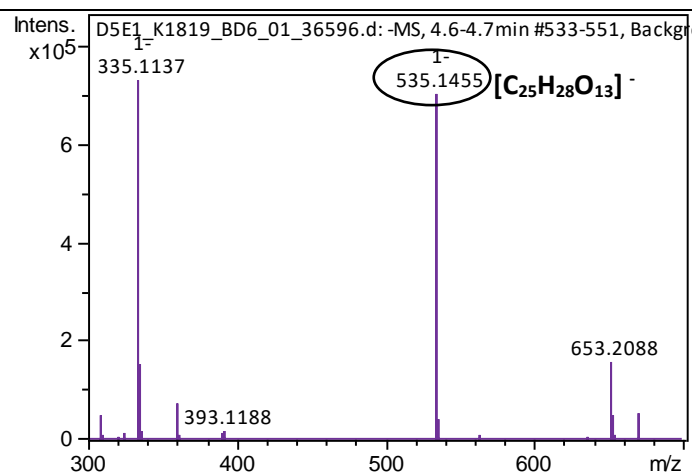

Fig S5b. Background subtracted MS Spectra from 4.5 to 4.7 min

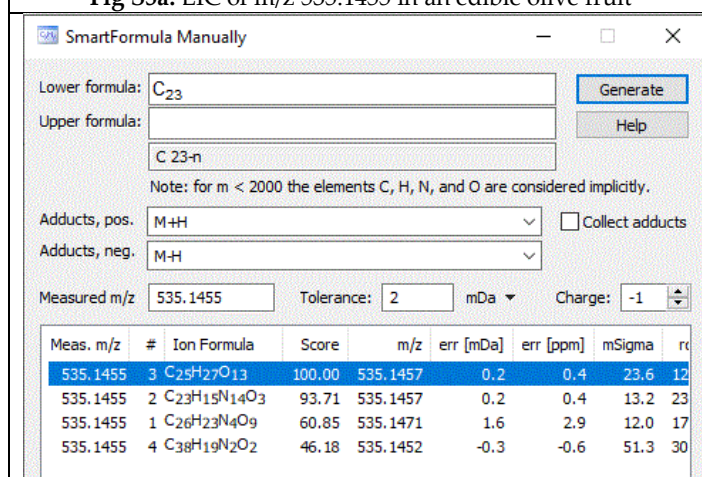

Fig S5c. Molecular Formula Annotation of m/z 535.1455

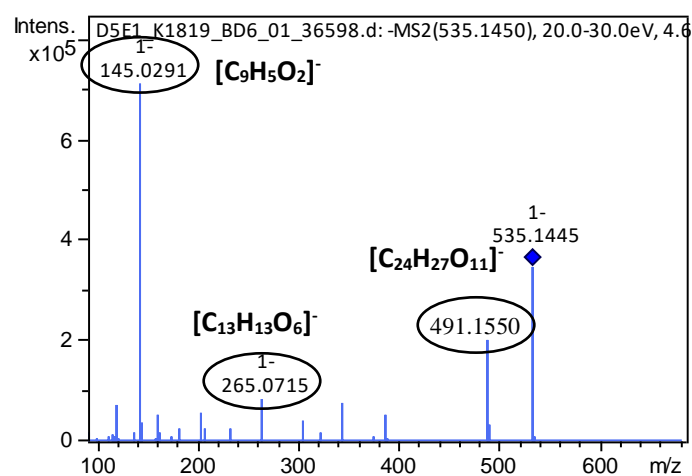

Fig S5d. Background subtracted MS/MS Spectra from 4.5 to 4.7 min

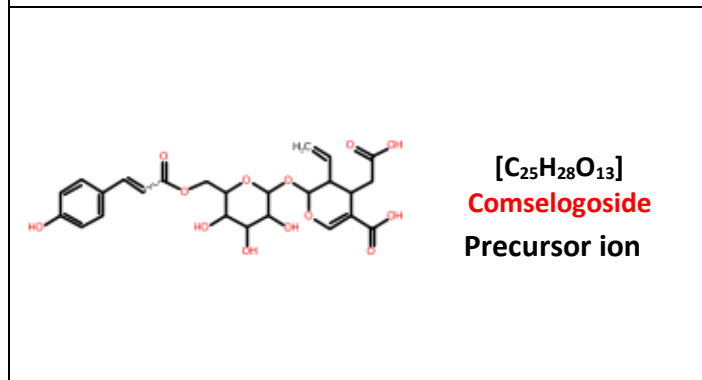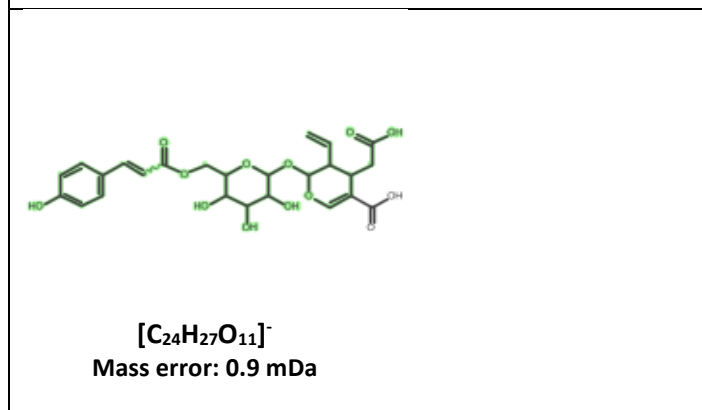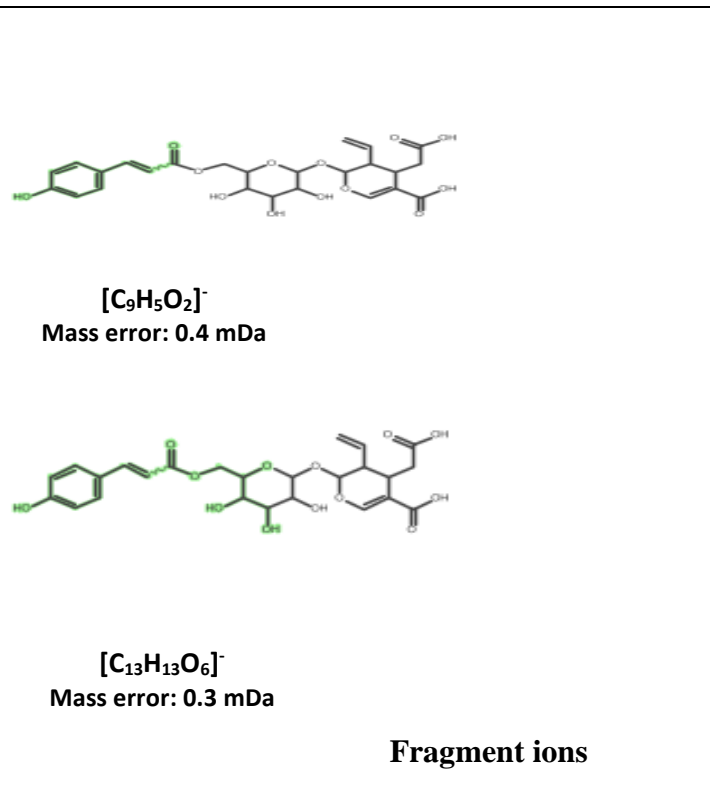

Fig S5e. Structures of precursor and fragment ions of Comselogside

**Figure S5.** Identification data for the mass feature m/z 535.1455\_4.6 min (Comselogoside)

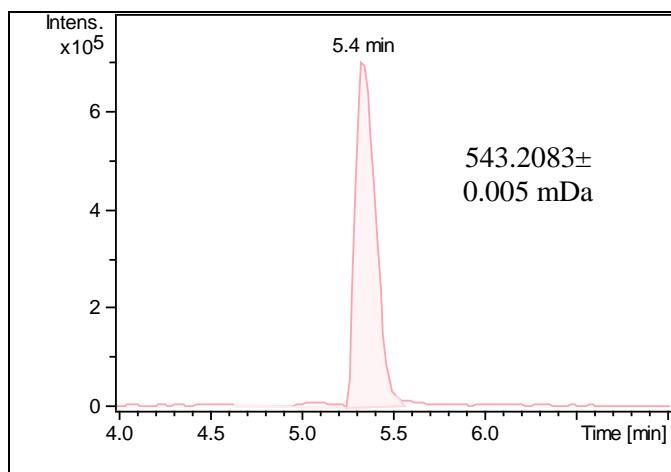

**Fig S6a.** EIC of m/z 543.2083 in an edible olive fruit

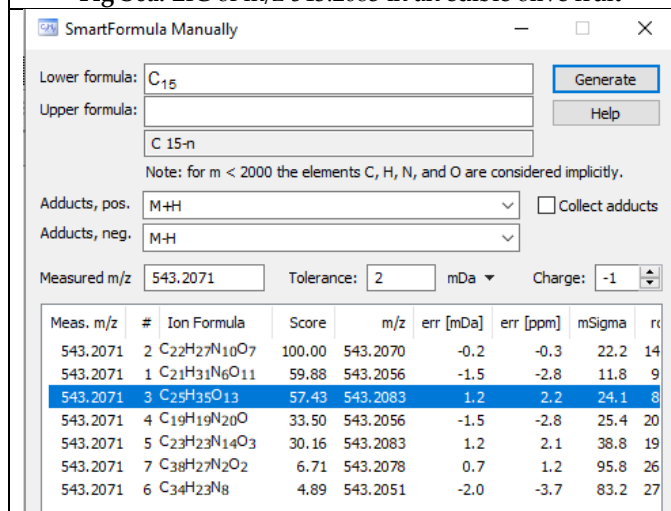

**Fig S6c.** Molecular Formula Annotation of m/z 543.2083

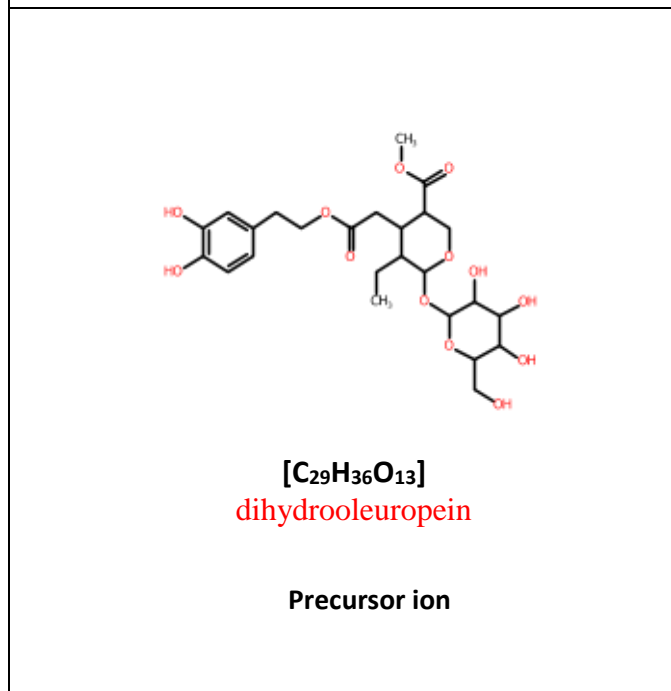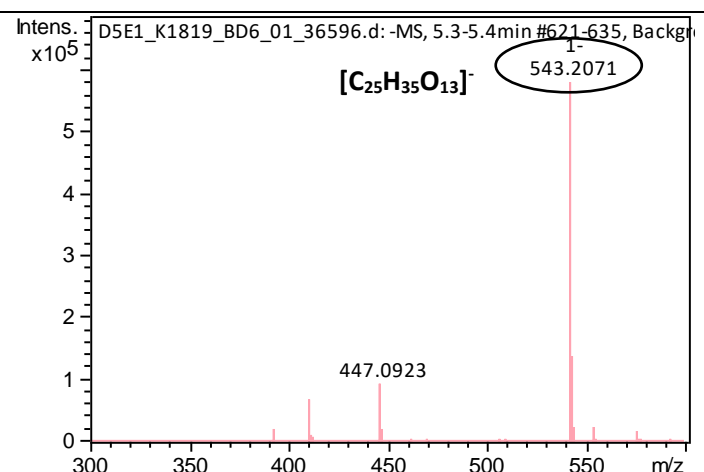

**Fig S6b.** Background subtracted MS Spectra from 5.3 to 5.5 min

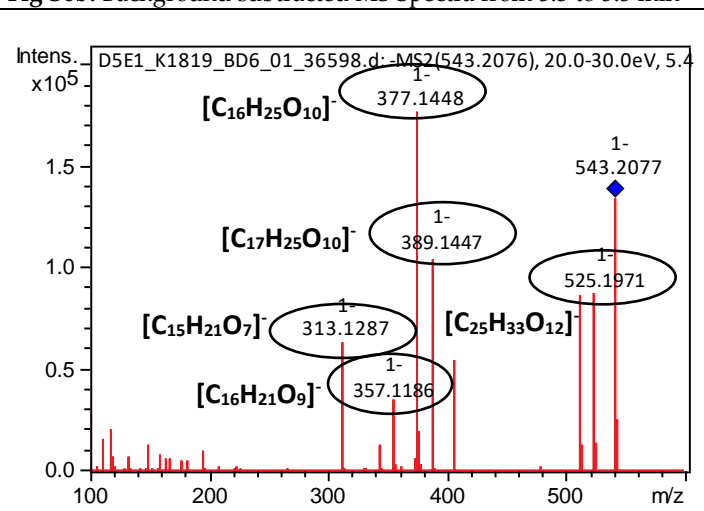

**Fig S6d.** Background subtracted MS/MS Spectra from 5.3 to 5.5 min

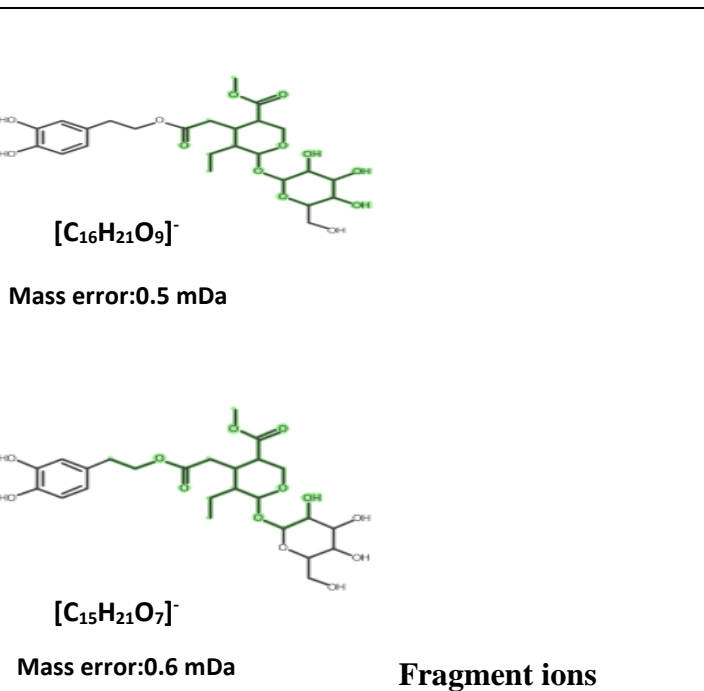

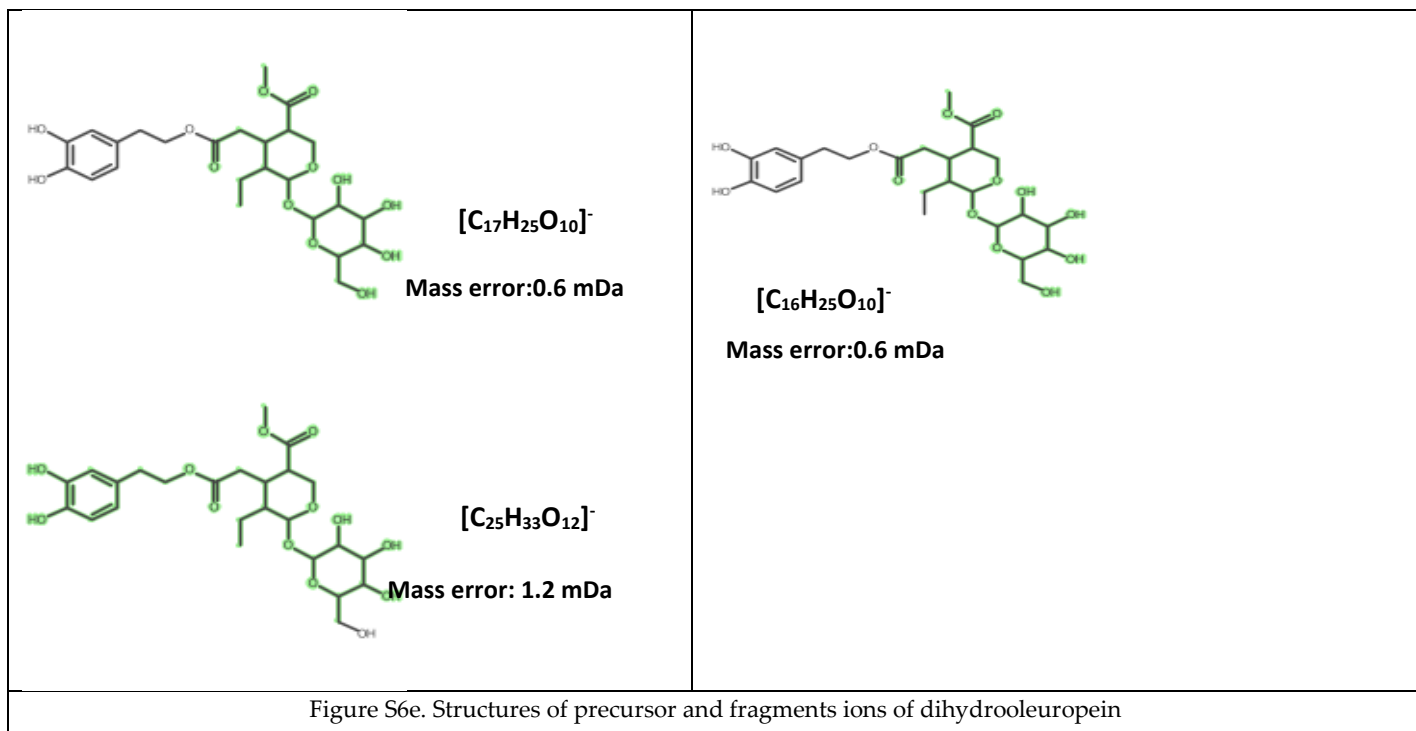

**Figure S6.** Identification data for the mass feature m/z 543.2083\_5.4 min (dihydrooleuropein)

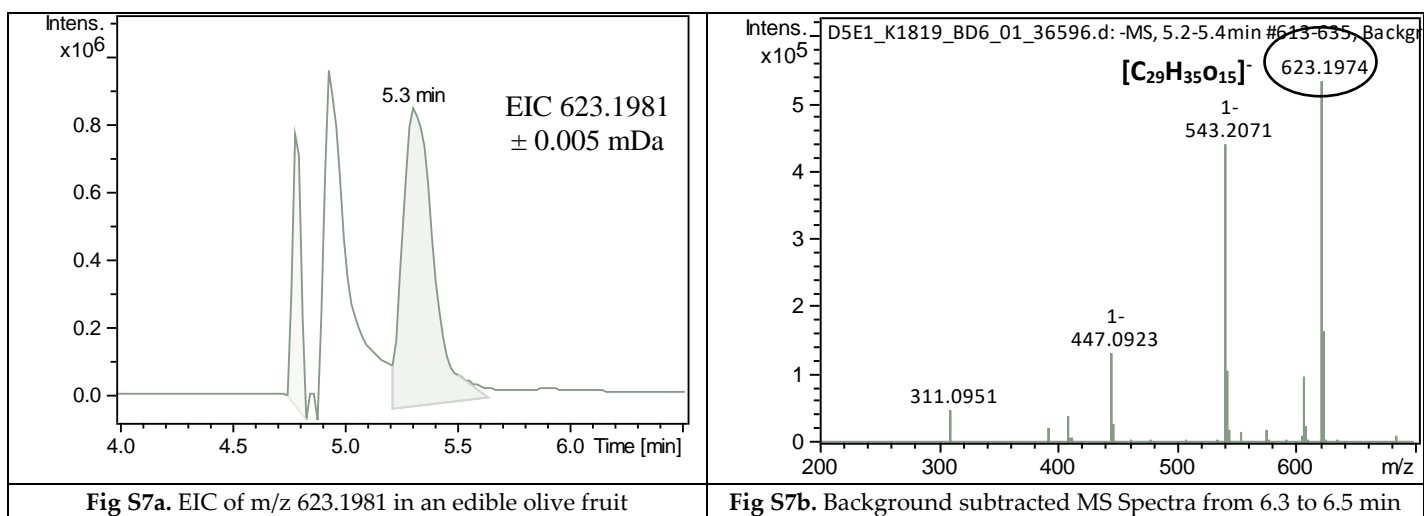

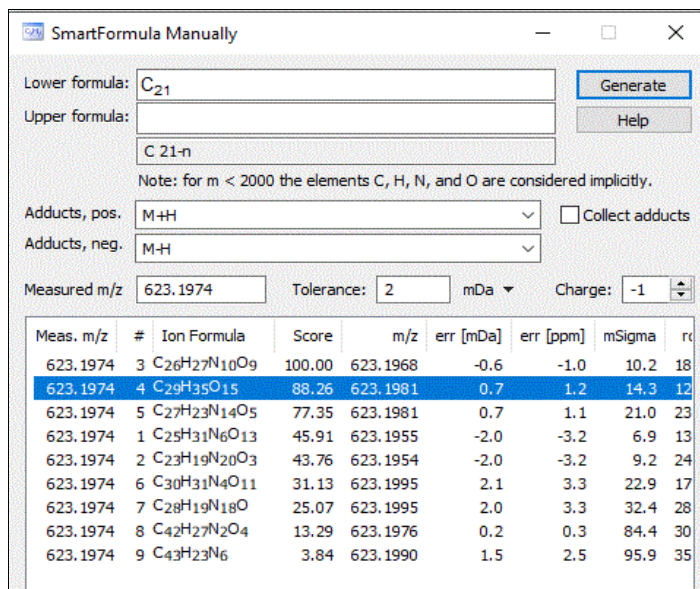

Fig S7c. Molecular Formula Annotation of m/z 623.1981

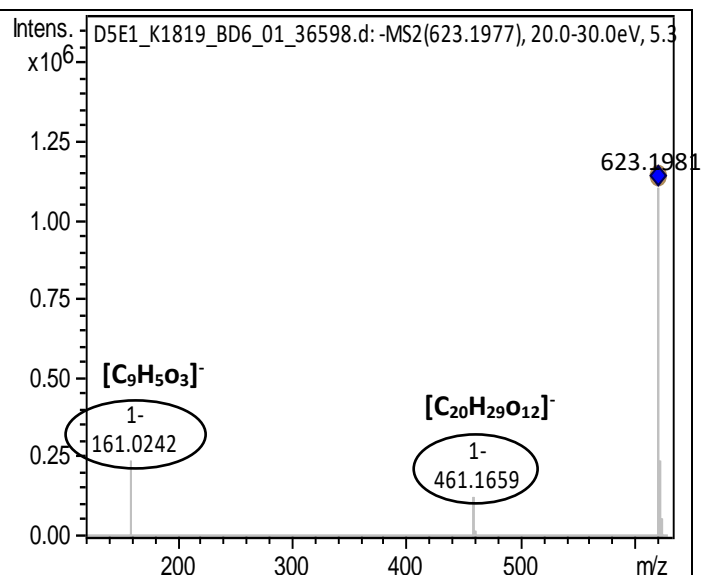

Fig S7d. Background subtracted MS/MS Spectra from 6.3 to 6.5 min

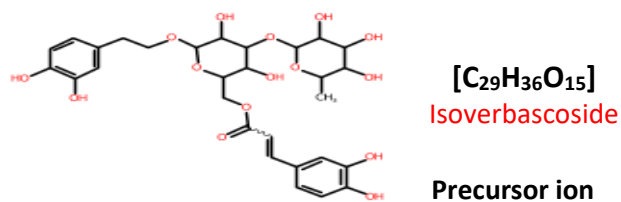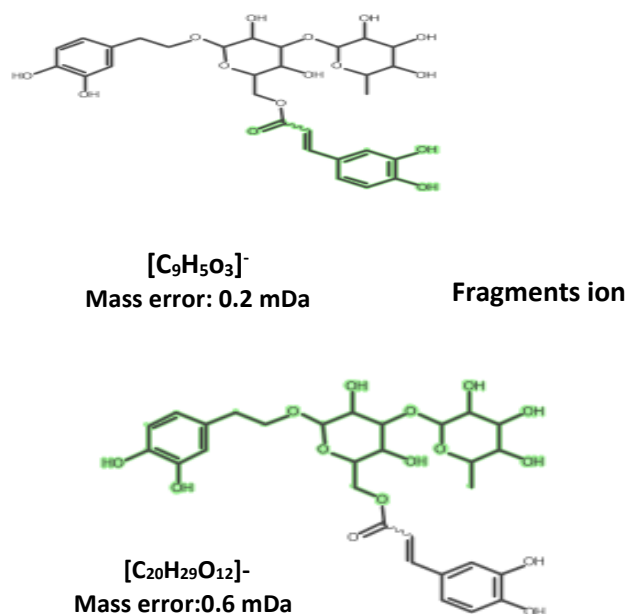

Fig S7e. Structures of precursor and fragment ions of Isoverbascoside

Figure S7. Identification data for the mass feature m/z 623.1981\_5.3 min (Isoverbascoside)

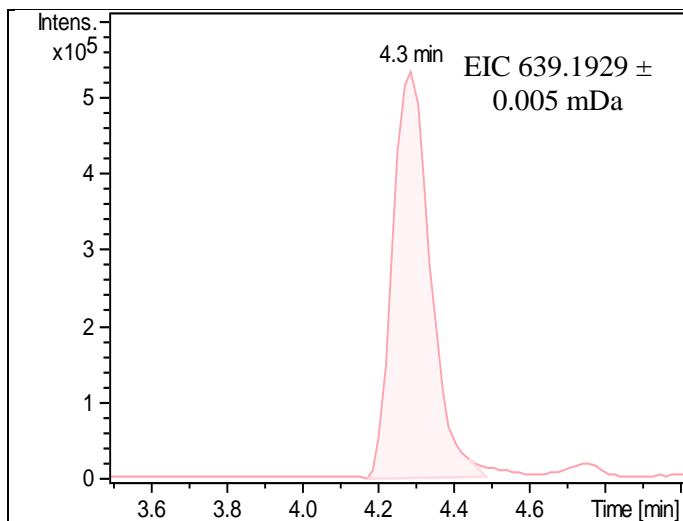

**Fig S8a.** EIC of m/z 639.1929 in an edible olive fruit

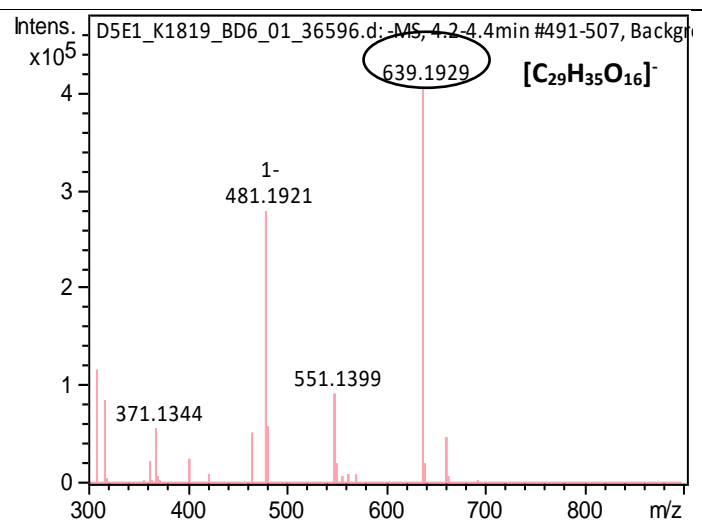

**Fig S8b.** Background subtracted MS Spectra from 4.0 to 4.2 min

SmartFormula Manually

Lower formula: C<sub>14</sub> Generate

Upper formula: C<sub>14</sub>-n Help

Note: for m < 2000 the elements C, H, N, and O are considered implicitly.

Adducts, pos. M+H Collect adducts

Adducts, neg. M-H

Measured m/z 639.1923 Tolerance: 2 mDa Charge: -1

| Meas. m/z | # | Ion Formula                                                     | Score  | m/z      | err [mDa] | err [ppm] | mSigma |
|-----------|---|-----------------------------------------------------------------|--------|----------|-----------|-----------|--------|
| 639.1923  | 1 | C <sub>14</sub> H <sub>31</sub> N <sub>12</sub> O <sub>17</sub> | 100.00 | 639.1936 | 1.3       | 2.0       | 14.7   |
| 639.1923  | 2 | C <sub>25</sub> H <sub>31</sub> N <sub>6</sub> O <sub>14</sub>  | 36.31  | 639.1904 | -1.9      | -3.0      | 38.8   |
| 639.1923  | 3 | C <sub>26</sub> H <sub>27</sub> N <sub>10</sub> O <sub>10</sub> | 59.62  | 639.1917 | -0.6      | -0.9      | 50.3   |
| 639.1923  | 4 | C <sub>29</sub> H <sub>35</sub> O <sub>16</sub>                 | 54.42  | 639.1931 | 0.8       | 1.2       | 50.4   |
| 639.1923  | 5 | C <sub>23</sub> H <sub>19</sub> N <sub>2</sub> O <sub>4</sub>   | 25.28  | 639.1904 | -1.9      | -3.0      | 51.0   |
| 639.1923  | 6 | C <sub>27</sub> H <sub>23</sub> N <sub>14</sub> O <sub>6</sub>  | 37.56  | 639.1930 | 0.8       | 1.2       | 62.0   |
| 639.1923  | 7 | C <sub>24</sub> H <sub>15</sub> N <sub>24</sub>                 | 21.72  | 639.1917 | -0.6      | -0.9      | 71.4   |
| 639.1923  | 8 | C <sub>42</sub> H <sub>27</sub> N <sub>2</sub> O <sub>5</sub>   | 3.03   | 639.1925 | 0.2       | 0.4       | 123.4  |
| 639.1923  | 9 | C <sub>43</sub> H <sub>23</sub> N <sub>6</sub> O                | 0.73   | 639.1939 | 1.6       | 2.5       | 135.1  |

**Fig S8c.** Molecular Formula Annotation of m/z 639.1929

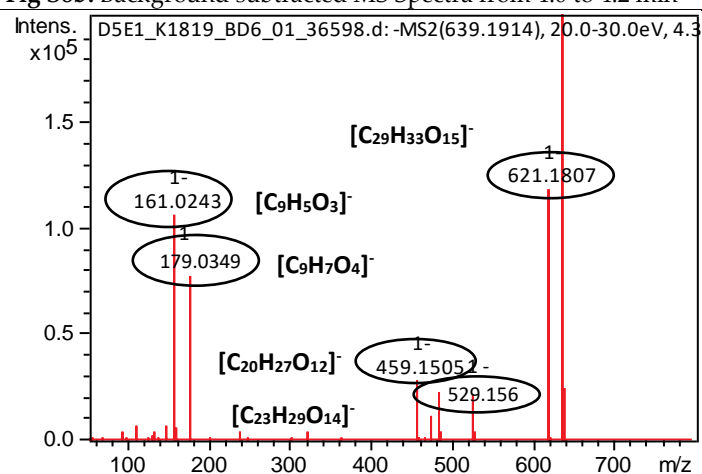

**Fig S8d.** Background subtracted MS/MS Spectra from 4.0 to 4.2 min

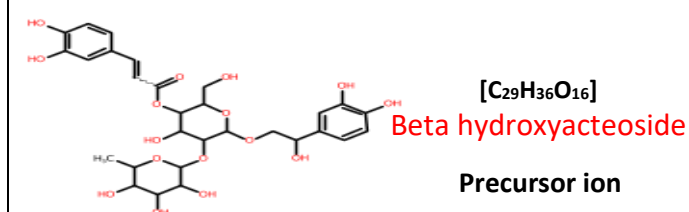



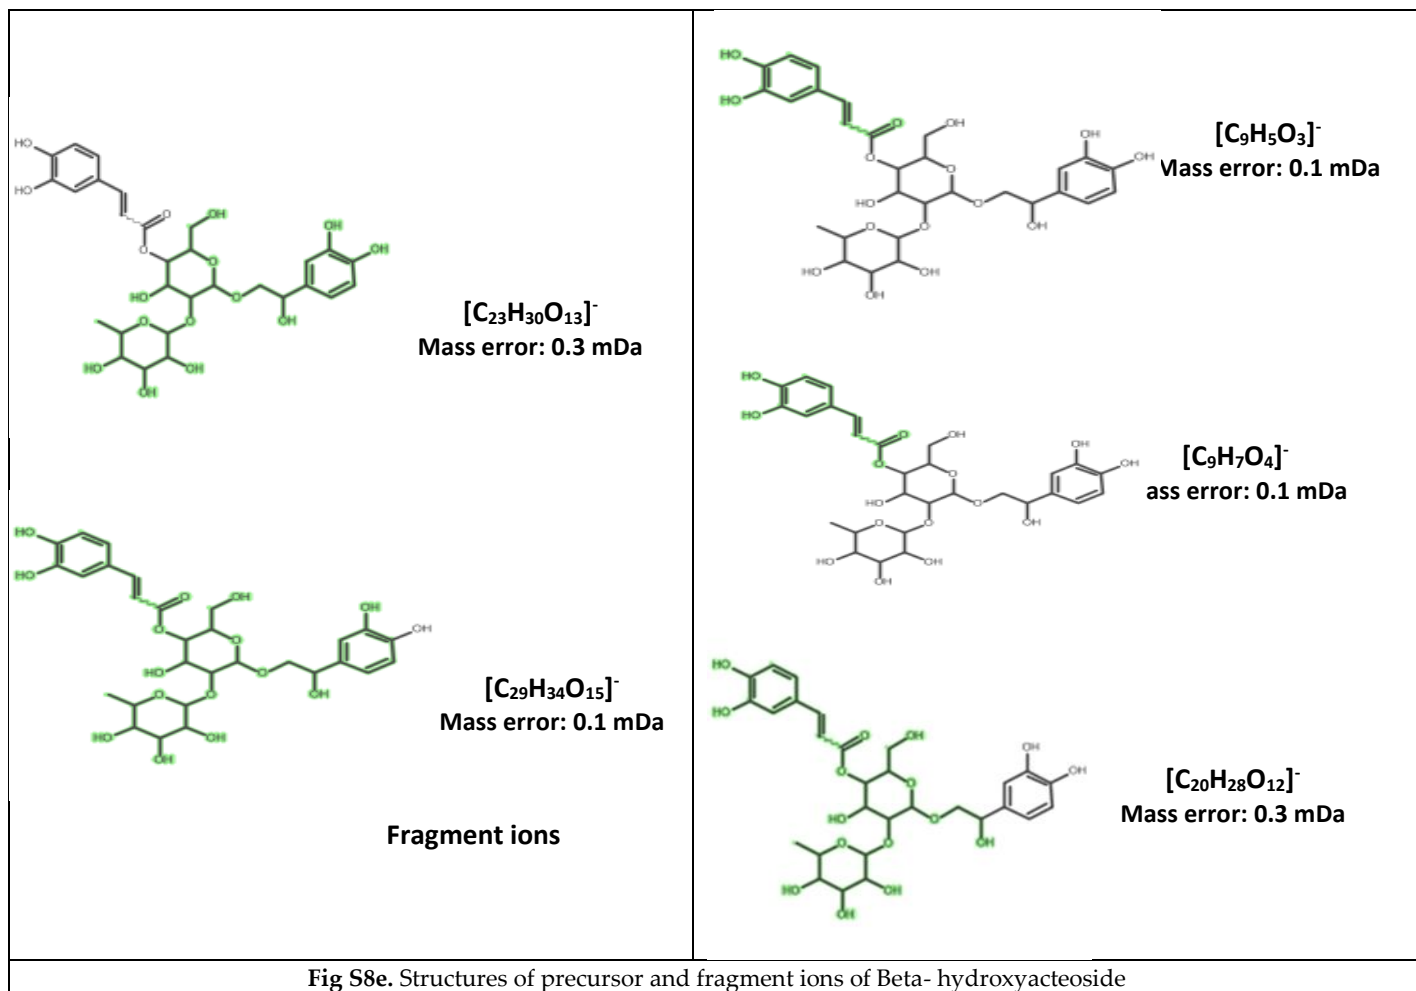

**Figure S8.** Identification data for the mass feature m/z 639.1929\_4.3 min (beta-hydroxyacteoside)

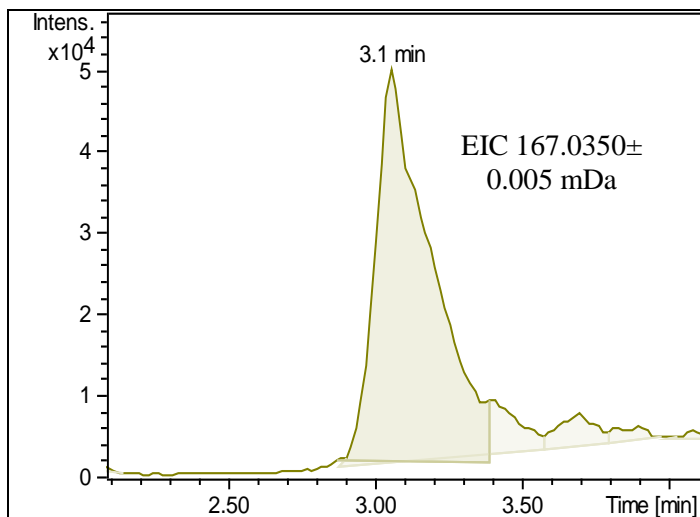

**Fig S9a.** EIC of m/z 167.0350 in an edible olive fruit

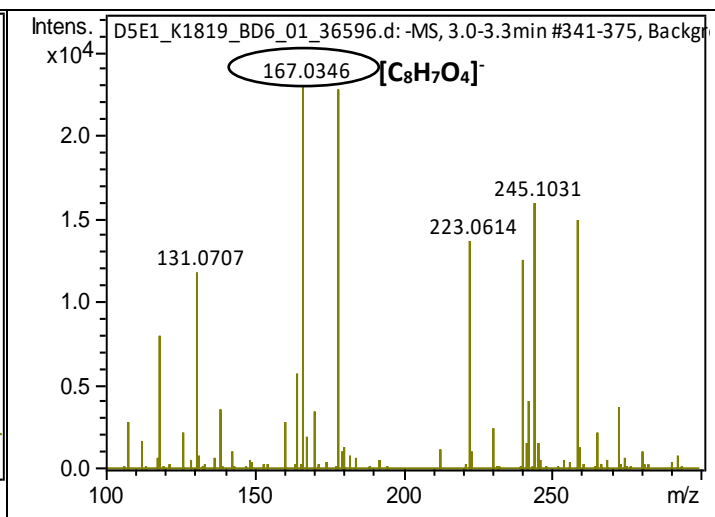

**Fig S9b.** Background subtracted MS Spectra from 3.0 to 3.3min



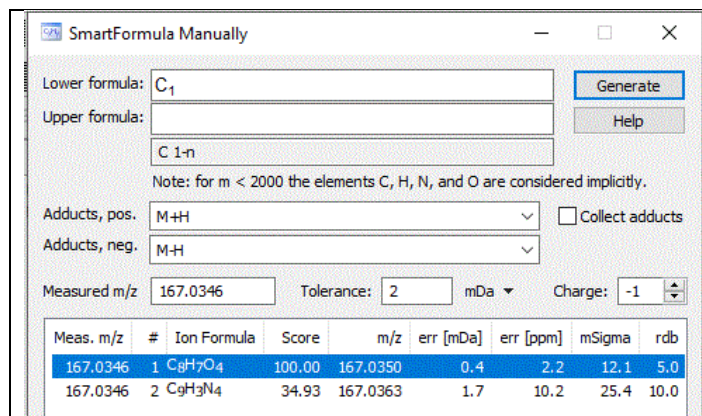

Fig S9c. Molecular Formula Annotation of m/z 167.0350

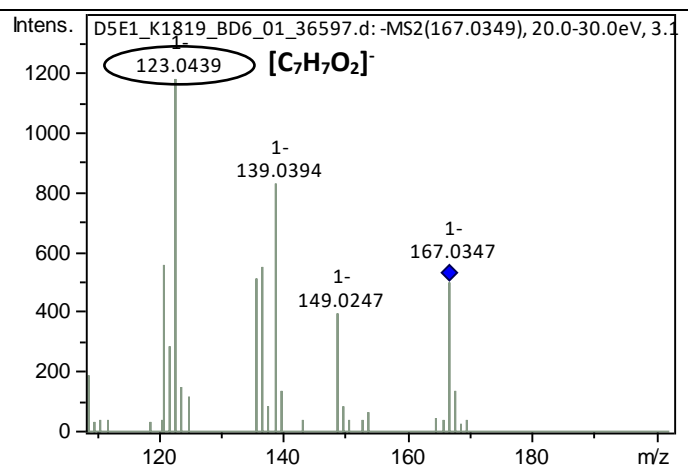

Fig S9d. Background subtracted MS/MS Spectra from 3.0 to 3.3 min

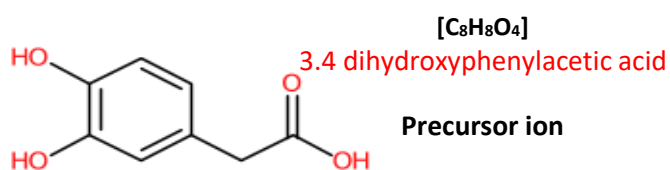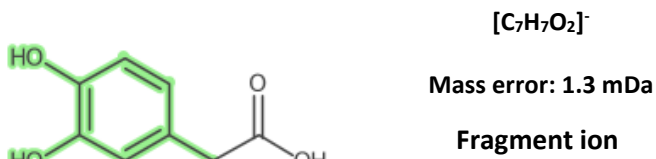

Fig S9e. Structures of precursor and fragment ions of 3,4 dihydroxyphenylacetic acid

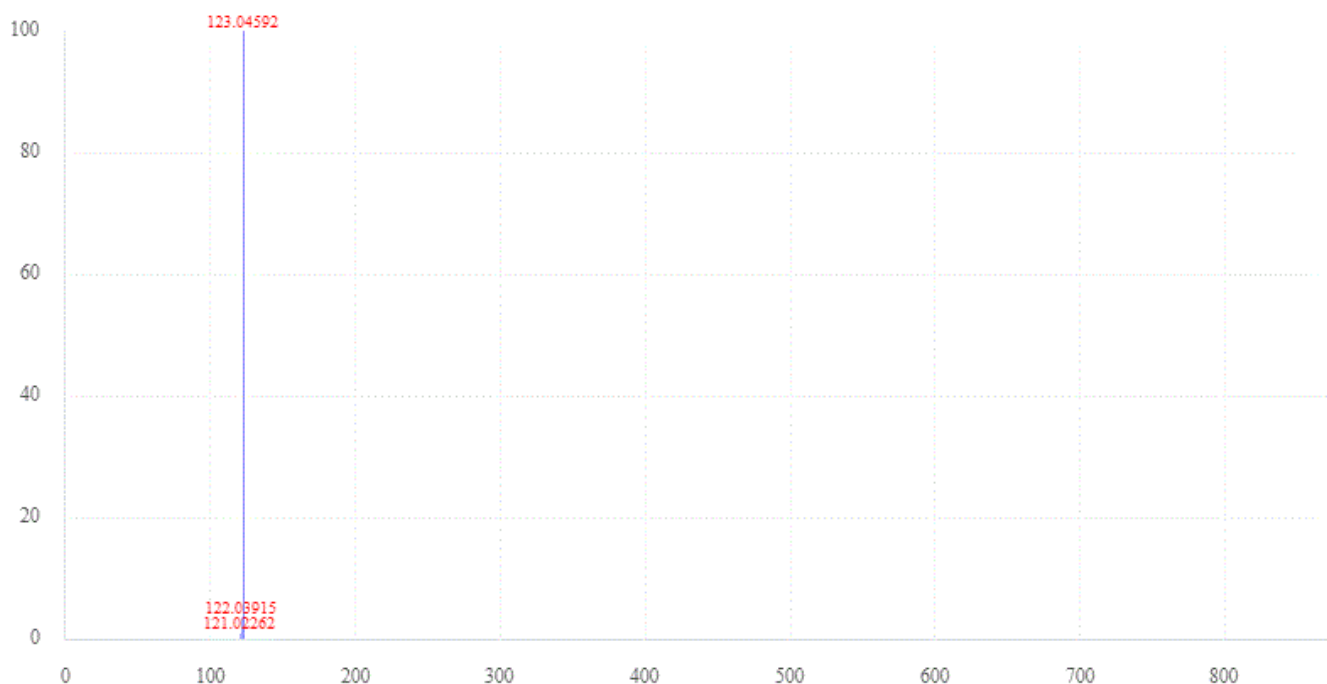

Fig. S9f: Fiehn Lab HILIC Library Record FiehnHILIC002487 (3,4 dihydroxyphenylacetic acid)

Figure S9. Identification data for the mass feature m/z 167.0350\_3.1 min (3,4 dihydroxyphenylacetic acid)

**Table S7.** Maturation stage of Kolovi samples

| Sample   | Fruit maturity stage (based on color) |
|----------|---------------------------------------|
| Sample 1 | G. PG. B                              |
| Sample 2 | G                                     |
| Sample 3 | G. PG                                 |
| Sample 4 | B                                     |
| Sample 5 | G. PG                                 |
| Sample 6 | G                                     |
| Sample 7 | G                                     |

G: green. LG: Light Green PG: purple green. B: black

**Table S8.** LC gradient elution and flow rate program (UPLC-QTOF-MS)

| Time (min) | Flow rate (mL/min) | %A  | %B   |
|------------|--------------------|-----|------|
| 0          | 0.2                | 99  | 1    |
| 1.0        | 0.2                | 99  | 1    |
| 3.0        | 0.2                | 61  | 39   |
| 14.0       | 0.4                | 0.1 | 99.9 |
| 16.0       | 0.48               | 0.1 | 99.9 |
| 16.1       | 0.48               | 99  | 1    |
| 19.0       | 0.48               | 99  | 1    |
| 19.1       | 0.2                | 99  | 1    |
| 20.0       | 0.2                | 99  | 1    |

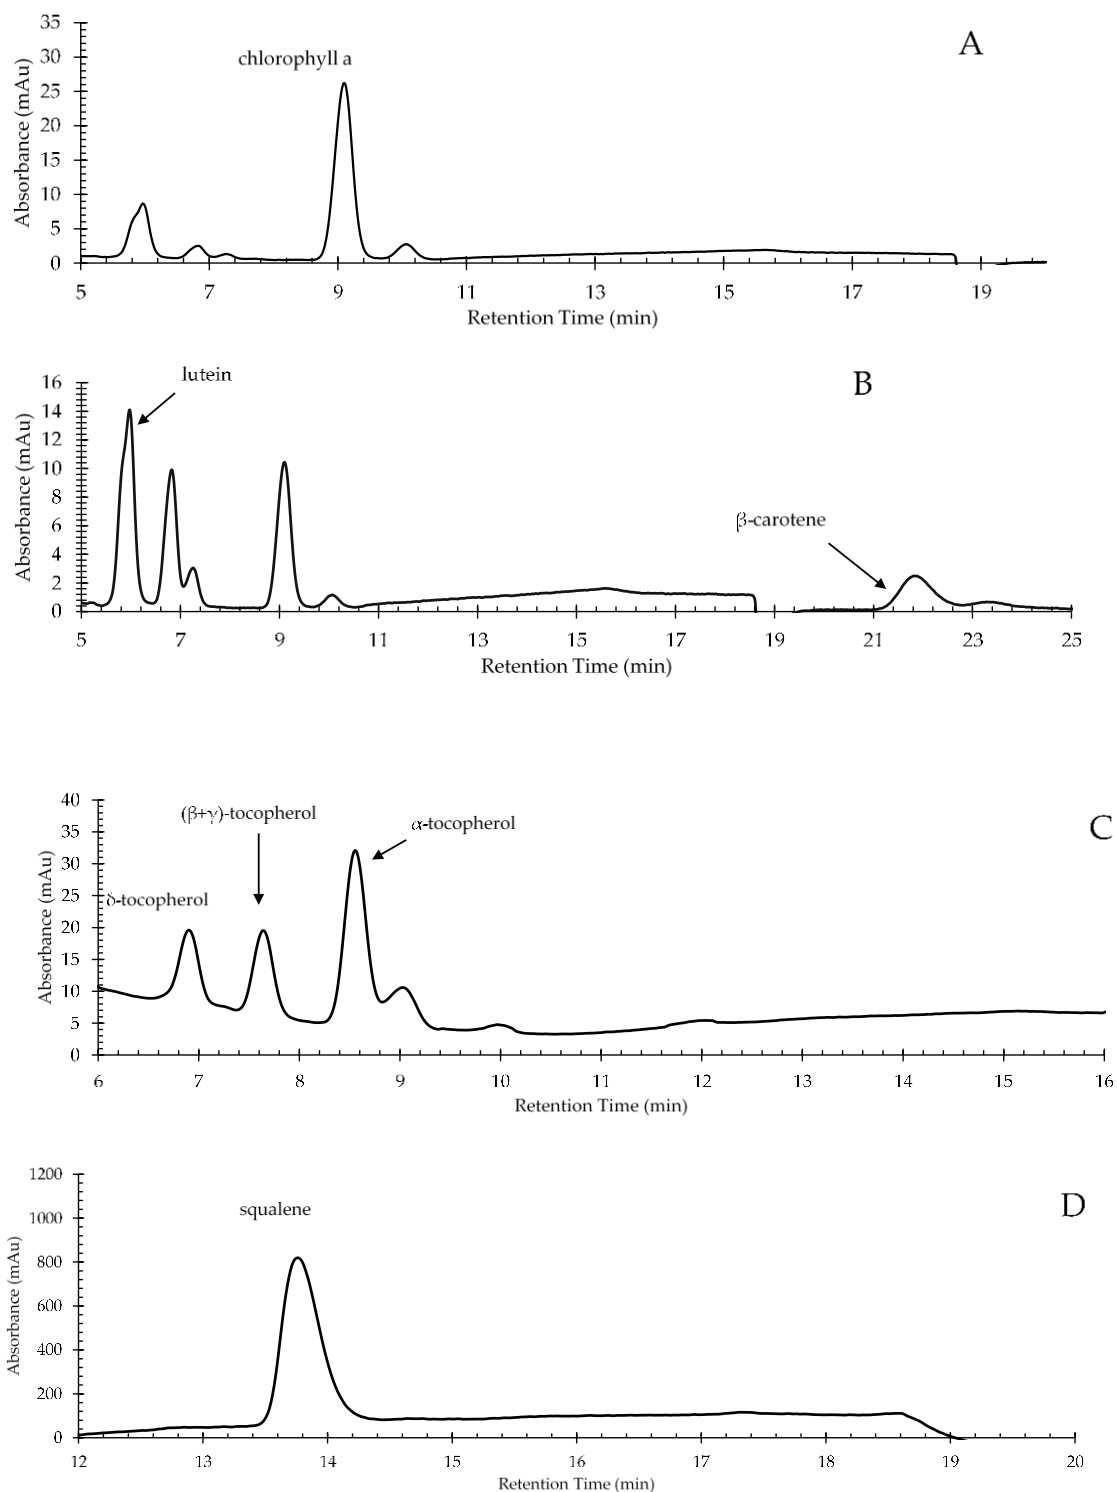

**Figure S10:** Chromatograms from the analysis of olive drupes. spiked with known amount of the analytes of interest. A: 410 nm (spiked with 25 mg/kg chlorophyll a). B: 450 nm (spiked with 3 mg/kg lutein and 2.95 mg/kg  $\beta$ -carotene). C: 295 nm (spiked with 50 mg/kg  $\alpha$ -,  $\gamma$ -, and  $\delta$ -tocopherols). D: 210 nm (spiked with 500 mg/kg squalene)
